# The Moduli Scheme of Affine Spherical Varieties with a Free Weight Monoid

Paolo Bravi<sup>1</sup> and Bart Van Steirteghem<sup>2</sup>

<sup>1</sup>Dipartimento di Matematica "Guido Castelnuovo", "Sapienza"

Università di Roma, Piazzale Aldo Moro 5, 00185 Roma, Italy and

<sup>2</sup>Department of Mathematics, Medgar Evers College–City University of New York, 1650 Bedford Avenue, Brooklyn, NY 11225, USA

*Correspondence to be sent to: e-mail: bartvs@mec.cuny.edu*

We study Alexeev and Brion's moduli scheme  $M_\Gamma$  of affine spherical varieties with weight monoid  $\Gamma$  under the assumption that  $\Gamma$  is free. We describe the tangent space to  $M_\Gamma$  at its "most degenerate point" in terms of the combinatorial invariants of spherical varieties and deduce that the irreducible components of  $M_\Gamma$ , equipped with their reduced induced scheme structure, are affine spaces.

## 1 Introduction

As part of the classification problem of algebraic varieties equipped with a group action, spherical varieties, which include symmetric, toric, and flag varieties, have received considerable attention; see, for example, [9, 18, 20, 21]. In [2], Alexeev and Brion introduced an important new tool for the study of affine spherical varieties over an algebraically closed field  $k$  of characteristic 0. We recall that an affine variety  $X$  equipped with an action of a connected reductive group  $G$  is called spherical if it is normal and its coordinate ring  $k[X]$  is multiplicity-free as a  $G$ -module. For such a variety a natural invariant, which completely describes the  $G$ -module structure of  $k[X]$ , is its *weight monoid*  $\Gamma(X)$ . By definition,  $\Gamma(X)$  is the set of isomorphism classes of irreducible representations of  $G$

Received August 14 2014; Revised August 22, 2015; Accepted August 24, 2015

that occur in  $\mathbb{k}[X]$ . In view of the classification problem, we have the following natural question: how “good” an invariant is  $\Gamma(X)$ , or more explicitly: to what extent does  $\Gamma(X)$  determine the multiplicative structure of  $\mathbb{k}[X]$ ?

Alexeev and Brion brought geometry to this question as follows. After choosing a Borel subgroup  $B$  of  $G$ , and a maximal torus  $T$  in  $B$ , we can identify  $\Gamma(X)$  with a finitely generated submonoid of the monoid  $\Lambda^+$  of dominant weights. Let  $\Gamma$  be another such submonoid of  $\Lambda^+$  and put

$$V(\Gamma) = \bigoplus_{\lambda \in \Gamma} V(\lambda),$$

where we used  $V(\lambda)$  for the irreducible  $G$ -module corresponding to  $\lambda \in \Lambda^+$ . Let  $U$  be the unipotent radical of  $B$  and let  $V(\Gamma)^U$  be the subspace of  $U$ -invariants, which is also the space of highest weight vectors in  $V(\Gamma)$ . By choosing an isomorphism  $V(\Gamma)^U \rightarrow \mathbb{k}[\Gamma]$  of  $T$ -modules, where  $\mathbb{k}[\Gamma]$  is the semigroup ring associated with  $\Gamma$ , we equip  $V(\Gamma)^U$  with a  $T$ -multiplication law. Alexeev and Brion’s moduli scheme  $M_\Gamma$  parametrizes the  $G$ -multiplication laws on  $V(\Gamma)$  which extend the multiplication law on  $V(\Gamma)^U$ . For an introduction to this moduli scheme, we refer the reader to [11, Section 4.3]. Examples of  $M_\Gamma$  have been computed in [4, 16, 23].

Let  $\Lambda$  be the weight lattice of  $G$ , that is,  $\Lambda$  is the character group of  $T$ . Because  $X$  is normal, its weight monoid  $\Gamma(X)$  also satisfies the following equality in  $\Lambda \otimes_{\mathbb{Z}} \mathbb{Q}$

$$\Gamma(X) = \mathbb{Z}\Gamma(X) \cap \mathbb{Q}_{\geq 0}\Gamma. \quad (1.1)$$

By definition, this makes  $\Gamma(X)$  a *normal* submonoid of  $\Lambda^+$ .

In [11], Brion conjectured that the irreducible components of  $M_\Gamma$  are affine spaces. A precise version of this conjecture is the following.

**Conjecture 1.1.** If  $\Gamma$  is a normal submonoid of  $\Lambda^+$ , then the irreducible components of  $M_\Gamma$ , equipped with their reduced induced scheme structure, are affine spaces.  $\square$

This conjecture was verified for free and  $G$ -saturated monoids of dominant weights in [4]. In fact, Bravi and Cupit-Foutou proved that under these assumptions,  $M_\Gamma$  is an affine space. In [23, 24], it is shown that  $M_\Gamma$  is an affine space when  $\Gamma$  is the weight monoid of a spherical  $G$ -module. Luna provided the first non-irreducible example (unpublished): for  $G = \mathrm{SL}(2) \times \mathrm{SL}(2)$  and  $\Gamma = \langle 2\omega, 4\omega + 2\omega' \rangle$ , where  $\omega$  and  $\omega'$  are the fundamental weights of the two copies of  $\mathrm{SL}(2)$ , the scheme  $M_\Gamma$  is the union of two lines meeting in a point. In this paper, we verify that Conjecture 1.1 holds when  $\Gamma$  is free.

**Theorem 1.2** (Corollary 5.3). If  $\Gamma$  is a free submonoid of  $\Lambda^+$ , then the irreducible components of  $M_\Gamma$ , equipped with their reduced induced scheme structure, are affine spaces.  $\square$

The bulk of this paper is devoted to the description of the tangent space to  $M_\Gamma$  at its “most degenerate point”  $X_0$  in terms of certain combinatorial invariants, called  $N$ -spherical roots. To be more precise, we introduce some more terminology and recall some facts. If  $X$  is an affine spherical  $G$ -variety  $X$ , then its *root monoid*  $\mathcal{M}_X$  is the submonoid of  $\Lambda$  generated by the set

$$\{\lambda + \mu - \nu \mid \lambda, \mu, \nu \in \Lambda^+ \text{ such that } \langle \mathbb{k}[X]_{(\lambda)} \cdot \mathbb{k}[X]_{(\mu)} \rangle_{\mathbb{k}} \cap \mathbb{k}[X]_{(\nu)} \neq 0\}.$$

Here  $\mathbb{k}[X]_{(\lambda)}$  is the isotypic component of  $\mathbb{k}[X]$  of type  $\lambda \in \Lambda^+$ . Loosely speaking,  $\mathcal{M}_X$  detects how far the decomposition  $\mathbb{k}[X] = \bigoplus_{\lambda \in \Gamma(X)} \mathbb{k}[X]_{(\lambda)}$  is from being a grading by  $\Gamma(X)$ . A deep result by Knop [18, Theorem 1.3] says that the saturation of  $\mathcal{M}_X$ , which is the intersection in  $\Lambda \otimes_{\mathbb{Z}} \mathbb{Q}$  of the cone  $\mathbb{Q}_{\geq 0} \mathcal{M}_X$  and the lattice  $\mathbb{Z} \mathcal{M}_X$ , is a freely generated monoid. Its basis  $\Sigma^N(X)$  is called the set of  *$N$ -spherical roots* of  $X$ . By [2, Proposition 2.13] a formal consequence of our theorem above is that if  $X$  is an affine spherical  $G$ -variety with a free weight monoid, then its root monoid  $\mathcal{M}_X$  is also free; see Corollary 5.2.

In their seminal paper [2], Alexeev and Brion equipped  $M_\Gamma$  with an action of the maximal torus  $T$  of  $G$ . For this action,  $M_\Gamma$  has a unique closed orbit, which is a fixed point  $X_0$ . Consequently, the tangent space  $T_{X_0} M_\Gamma$  to  $M_\Gamma$  at the point  $X_0$  is a finite-dimensional  $T$ -module. We describe this tangent space as follows.

**Theorem 1.3** (Theorem 4.1 and Corollary 4.2). If  $\Gamma$  is a free submonoid of  $\Lambda^+$ , then  $T_{X_0} M_\Gamma$  is a multiplicity-free  $T$ -module, and  $\gamma \in \Lambda$  occurs as a weight in  $T_{X_0} M_\Gamma$  if and only if there exists an affine spherical  $G$ -variety  $X_{-\gamma}$  with weight monoid  $\Gamma$  and  $\Sigma^N(X_{-\gamma}) = \{-\gamma\}$ .  $\square$

To prove this, we first use the combinatorial theory of spherical varieties [17, 20, 21] to combinatorially characterize the weights  $\gamma$  for which such a variety  $X_{-\gamma}$  exists; see Corollary 2.17. Such a characterization was sketched by Luna in 2005 in an unpublished note.

To prove Theorem 1.2 we use Theorem 1.3: since it is known that the irreducible components of  $M_\Gamma$ , equipped with their reduced induced scheme structure, are affine

spaces after normalization (by [18, Theorem 1.3; 2, Corollary 2.14]), it is enough to show that they are smooth, and this follows from our description of the tangent space to  $M_\Gamma$  at  $X_0$  (see Section 5).

## Notation

Except if explicitly stated otherwise,  $\Gamma$  will be a *free* submonoid of  $\Lambda^+$  with basis  $F = \{\lambda_1, \lambda_2, \dots, \lambda_r\}$ . We will use  $S$  for the set of simple roots of  $G$  (associated with  $B$  and  $T$ ) and  $R^+$  for the set of positive roots. The irreducible representation of  $G$  associated with the dominant weight  $\lambda \in \Lambda^+$  is denoted by  $V(\lambda)$  and we use  $v_\lambda$  for a highest weight vector in  $V(\lambda)$ . We use  $\mathfrak{g}, \mathfrak{b}, \mathfrak{t}, \mathfrak{n}$ , etc. for the Lie algebra of  $G, B, T, U$ , etc., respectively. When  $\alpha$  is a root,  $X_\alpha \in \mathfrak{g}_\alpha$  is a root operator and  $\alpha^\vee$  the coroot. When  $\mathfrak{g}$  is simple, simple roots are denoted by  $\alpha_1, \dots, \alpha_n$  and numbered as by Bourbaki (see [7]), the corresponding fundamental weights are denoted by  $\omega_1, \dots, \omega_n$ .

## 2 Spherical Roots Adapted to $\Gamma$

In this section  $\Gamma$  denotes a normal, but *not necessarily free*, submonoid of  $\Lambda^+$ . By combining results from [6, 17, 20, 21] we will describe when a set of spherical roots is “adapted” or “N-adapted” to  $\Gamma$ . In particular, in Corollaries 2.16 and 2.17 we give an explicit characterization for when an element  $\sigma$  of the root lattice is “adapted” or “N-adapted” to  $\Gamma$ .

**Definition 2.1.** We say that a subset  $\Sigma$  of  $\mathbb{N}S$  is *N-adapted* to  $\Gamma$  if there exists an affine spherical  $G$ -variety  $X$  such that  $\Gamma(X) = \Gamma$  and  $\Sigma^N(X) = \Sigma$ . By slight abuse of language, we say that an element  $\sigma$  of  $\mathbb{N}S$  is N-adapted to  $\Gamma$  if  $\{\sigma\}$  is N-adapted to  $\Gamma$ .  $\square$

We will give the definition of “adapted”, which requires some more notions from the theory of spherical varieties, in Definition 2.11. After recalling some basic definitions concerning spherical varieties, we briefly discuss, in Section 2.2, the notion of “spherically closed spherical systems”, and the role they play in classifying spherically closed spherical subgroups of  $G$ . We then, in Section 2.3 review Luna’s “augmentations”. They classify the subgroups of  $G$  which have a given spherical closure  $K$ . Finally, after recalling some basic results from the Luna–Vust theory of spherical embeddings in Section 2.4, we deduce the combinatorial characterization of adapted and N-adapted spherical roots.

## 2.1 Basic definitions

In this section, we briefly recall the basic definitions of the theory of spherical varieties by freely quoting from [21]. For more details on these notions the reader can also consult [25, 27].

We recall that a (not necessarily affine)  $G$ -variety  $X$  is called *spherical* if it is normal and contains an open dense orbit for  $B$ . If  $X$  is affine, this is equivalent to the definition given before in terms of  $\mathbb{k}[X]$ .

The complement of the open  $B$ -orbit in  $X$  consists of finitely many  $B$ -stable prime divisors. Among those, the ones that are *not*  $G$ -stable are called the *colors* of  $X$ . The set of colors of  $X$  is denoted by  $\Delta_X$ .

By the *weight lattice*  $\Lambda(X)$  of  $X$  we mean the subgroup of  $\Lambda$  made up of the  $B$ -weights in the field of rational functions  $\mathbb{k}(X)$ . Since  $X$  has a dense  $B$ -orbit two rational  $B$ -eigenfunctions on  $X$  of the same weight are scalar multiples of one another.

Let  $P_X$  be the stabilizer of the open  $B$ -orbit and denote by  $S_X^p$  the subset of simple roots corresponding to  $P_X$ , which is a parabolic subgroup of  $G$  containing  $B$ .

Let  $\mathcal{V}_X \subset \text{Hom}(\Lambda(X), \mathbb{Q})$  be the so-called *valuation cone* of  $X$ , that is, the set of  $\mathbb{Q}$ -valued  $G$ -invariant valuations on  $\mathbb{k}(X)$  seen as functionals on  $\Lambda(X)$ . By [9, Theorem 3.5],  $\mathcal{V}_X$  is a cosimplicial cone. Let  $\Sigma(X)$  be the set of linearly independent primitive elements in  $\Lambda(X)$  such that

$$\mathcal{V}_X = \{v \in \text{Hom}(\Lambda(X), \mathbb{Q}) : \langle v, \sigma \rangle \leq 0 \text{ for all } \sigma \in \Sigma(X)\},$$

that is, the set of *spherical roots* of  $X$ .

Similarly, the discrete valuations on  $\mathbb{k}(X)$  associated with colors give rise to functionals on  $\Lambda(X)$ . This yields the so-called *Cartan pairing* of  $X$ , a  $\mathbb{Z}$ -bilinear map denoted by

$$c_X: \mathbb{Z}\Delta_X \times \Lambda(X) \rightarrow \mathbb{Z}.$$

Since  $X$  has a dense  $B$ -orbit, it has a dense  $G$ -orbit. Let  $H$  be the stabilizer of a point in this orbit, which we can then identify with  $G/H$ . The group  $H$  is called a *spherical subgroup* of  $G$  because  $G/H$  is a spherical  $G$ -variety. To  $H$ , we can associate a larger group  $\bar{H}$ , called the *spherical closure* of  $H$ : the normalizer of  $H$  in  $G$  acts by  $G$ -equivariant automorphisms on  $G/H$  and  $\bar{H}$  is the kernel of the induced action of this normalizer on  $\Delta_X$  (see [21, Section 6.1] or [5, Section 2.4.1]). We recall that it follows from [5, Lemma 2.4.2] that  $\bar{\bar{H}} = \bar{H}$  (see [26, Proposition 3.1] for a direct proof).

## 2.2 Spherical systems

Here, we briefly recall the definition of spherical system and its role in the classification of spherical varieties; see [5, 21].

Wonderful varieties are special spherical varieties satisfying certain regularity properties. We do not need their definition here, we just recall that by [6, 20] wonderful  $G$ -varieties (or their open  $G$ -orbits) are classified by their so-called spherical systems. This was known as Luna's conjecture, another proof of which was proposed in [13]. By [18], spherical homogeneous spaces  $G/K$  with  $K$  *spherically closed* (i.e.,  $\bar{K} = K$ ) can be realized as the open  $G$ -orbit of a unique wonderful variety. Consequently, they correspond to spherically closed spherical  $G$ -systems (systems satisfying certain combinatorial conditions, as explained below):

$$G/K \mapsto \mathcal{S}_{G/K} = \left( S_{G/K}^p, \Sigma(G/K), \mathbf{A}_{G/K} \right).$$

Let  $K$  be a spherically closed spherical subgroup of  $G$ . The set  $\Sigma(G/K)$  of spherical roots of  $G/K$  is included in the root lattice  $\mathbb{Z}S$  (because  $K$  contains the center of  $G$ ) and it is a basis of  $\Lambda(G/K)$ . Let  $\mathbf{A}_{G/K}$  be the set of colors that are not stable under some minimal parabolic containing  $B$  and corresponding to a simple root belonging to  $\Sigma(G/K)$ . The full Cartan pairing restricts to the  $\mathbb{Z}$ -bilinear pairing  $c_{G/K}: \mathbb{Z}\mathbf{A}_{G/K} \times \mathbb{Z}\Sigma(G/K) \rightarrow \mathbb{Z}$ , also called restricted Cartan pairing.

**Definition 2.2.** The set  $\Sigma^{sc}(G)$  of *spherically closed spherical roots of  $G$*  is defined as

$$\Sigma^{sc}(G) := \{\sigma \in \mathbb{Z}S: \sigma \in \Sigma(G/K) \text{ for some spherically closed spherical subgroup } K \text{ of } G\}.$$

Let  $H$  be a spherical subgroup of  $G$  and let  $X$  be any spherical  $G$ -variety with open  $G$ -orbit  $G/H$ . Let  $\bar{H}$  be the spherical closure of  $H$ . We define

$$\Sigma^{sc}(X) := \Sigma^{sc}(G/H) := \Sigma(G/\bar{H});$$

$$\Sigma^N(X) := \Sigma^N(G/H) := \Sigma(G/N_G(H)).$$

□

**Remark 2.3.**

1. It follows from [18, Theorem 1.3] that for  $X$  affine,  $\Sigma^N(X)$  given in Definition 2.2 agrees with the description in Section 1 of the set of  $N$ -spherical roots of  $X$ .

2. Thanks to [20, Theorem 2] one can precisely describe the relationship between the three sets  $\Sigma(X)$ ,  $\Sigma^{sc}(X)$ , and  $\Sigma^N(X)$ ; see Proposition 2.9 and [28] for more information.
3. While  $\Sigma^{sc}(X)$  and  $\Sigma^N(X)$  are subsets of  $\mathbb{N}S$ , there exist wonderful varieties  $X$  such that  $\Sigma(X) \not\subset \mathbb{Z}S$  (see [30]).
4.  $\Sigma(X)$  is not always a basis of  $\Lambda(X)$ , but it is when  $X$  is wonderful.
5. The weight lattice, valuation cone and spherical roots are birational invariants of the spherical variety  $X$  since they only depend on its open  $G$ -orbit  $G/H$ . The same is true of the colors and the Cartan pairing once we (naturally) identify the colors of  $G/H$  with their closures in  $X$ .  $\square$

The set  $\Sigma^{sc}(G)$  is finite. More precisely, there is the next proposition, which follows from the classification of spherically closed spherical subgroups  $K$  of  $G$  with  $\Lambda(G/K)$  of rank 1 [1, 20]; see also [5, Sections 1.1.6 and 2.4.1]. We recall that the *support*  $\text{supp}(\sigma)$  of  $\sigma \in \mathbb{N}S$  is the set of simple roots which have a nonzero coefficient in the unique expression of  $\sigma$  as a linear combination of the simple roots.

**Proposition 2.4.** An element  $\sigma$  of  $\mathbb{N}S$  belongs to  $\Sigma^{sc}(G)$  if and only if after numbering the simple roots in  $\text{supp}(\sigma)$  like Bourbaki (see [7])  $\sigma$  is listed in Table 1.  $\square$

Recall that  $K$  is a spherically closed spherical subgroup of  $G$ . Therefore, see [21, Section 7.1], the triple  $\mathcal{S}_{G/K} = (S_{G/K}^p, \Sigma(G/K), \mathbf{A}_{G/K})$  is a spherically closed Luna spherical system in the following sense.

**Definition 2.5.** Let  $(S^p, \Sigma, \mathbf{A})$  be a triple where  $S^p$  is a subset of  $S$ ,  $\Sigma$  is a subset of  $\Sigma^{sc}(G)$  and  $\mathbf{A}$  is a finite set endowed with a  $\mathbb{Z}$ -bilinear pairing  $c: \mathbb{Z}\mathbf{A} \times \mathbb{Z}\Sigma \rightarrow \mathbb{Z}$ . For every  $\alpha \in \Sigma \cap S$ , let  $\mathbf{A}(\alpha)$  denote the set  $\{D \in \mathbf{A} : c(D, \alpha) = 1\}$ . Such a triple is called a *spherically closed spherical  $G$ -system* if all the following axioms hold:

- (A1) for every  $D \in \mathbf{A}$  and every  $\sigma \in \Sigma$ , we have that  $c(D, \sigma) \leq 1$  and that if  $c(D, \sigma) = 1$ , then  $\sigma \in S$ ;
- (A2) for every  $\alpha \in \Sigma \cap S$ ,  $\mathbf{A}(\alpha)$  contains two elements, which we denote by  $D_\alpha^+$  and  $D_\alpha^-$ , and for all  $\sigma \in \Sigma$  we have  $c(D_\alpha^+, \sigma) + c(D_\alpha^-, \sigma) = \langle \alpha^\vee, \sigma \rangle$ ;
- (A3) the set  $\mathbf{A}$  is the union of  $\mathbf{A}(\alpha)$  for all  $\alpha \in \Sigma \cap S$ ;
- ( $\Sigma$ 1) if  $2\alpha \in \Sigma \cap 2S$ , then  $\frac{1}{2}\langle \alpha^\vee, \sigma \rangle$  is a non-positive integer for all  $\sigma \in \Sigma \setminus \{2\alpha\}$ ;
- ( $\Sigma$ 2) if  $\alpha, \beta \in S$  are orthogonal and  $\alpha + \beta$  belongs to  $\Sigma$ , then  $\langle \alpha^\vee, \sigma \rangle = \langle \beta^\vee, \sigma \rangle$  for all  $\sigma \in \Sigma$ ;

**Table 1.** Spherically closed spherical roots

| Type of support  | $\sigma$                                                            |
|------------------|---------------------------------------------------------------------|
| $A_1$            | $\alpha$                                                            |
| $A_1$            | $2\alpha$                                                           |
| $A_1 \times A_1$ | $\alpha + \alpha'$                                                  |
| $A_n, n \geq 2$  | $\alpha_1 + \cdots + \alpha_n$                                      |
| $A_3$            | $\alpha_1 + 2\alpha_2 + \alpha_3$                                   |
| $B_n, n \geq 2$  | $\alpha_1 + \cdots + \alpha_n$<br>$2(\alpha_1 + \cdots + \alpha_n)$ |
| $B_3$            | $\alpha_1 + 2\alpha_2 + 3\alpha_3$                                  |
| $C_n, n \geq 3$  | $\alpha_1 + 2(\alpha_2 + \cdots + \alpha_{n-1}) + \alpha_n$         |
| $D_n, n \geq 4$  | $2(\alpha_1 + \cdots + \alpha_{n-2}) + \alpha_{n-1} + \alpha_n$     |
| $F_4$            | $\alpha_1 + 2\alpha_2 + 3\alpha_3 + 2\alpha_4$                      |
| $G_2$            | $4\alpha_1 + 2\alpha_2$<br>$\alpha_1 + \alpha_2$                    |

- (S) every  $\sigma \in \Sigma$  is *compatible* with  $S^p$ , that is, for every  $\sigma \in \Sigma$  there exists a spherically closed spherical subgroup  $K$  of  $G$  with  $S_{G/K}^p = S^p$  and  $\Sigma(G/K) = \{\sigma\}$ .  $\square$

**Remark 2.6.**

- Condition (S) of Definition 2.5 can be stated in purely combinatorial terms as follows (see [5, Section 1.1.6]). A spherically closed spherical root  $\sigma$  is compatible with  $S^p$  if and only if:

- in case  $\sigma = \alpha_1 + \cdots + \alpha_n$  with support of type  $B_n$

$$\{\alpha \in \text{supp}\sigma : \langle \alpha^\vee, \sigma \rangle = 0\} \setminus \{\alpha_n\} \subseteq S^p \subseteq \{\alpha \in S : \langle \alpha^\vee, \sigma \rangle = 0\} \setminus \{\alpha_n\},$$

- in case  $\sigma = \alpha_1 + 2(\alpha_2 + \cdots + \alpha_{n-1}) + \alpha_n$  with support of type  $C_n$

$$\{\alpha \in \text{supp}\sigma : \langle \alpha^\vee, \sigma \rangle = 0\} \setminus \{\alpha_1\} \subseteq S^p \subseteq \{\alpha \in S : \langle \alpha^\vee, \sigma \rangle = 0\},$$

- in the other cases

$$\{\alpha \in \text{supp}\sigma : \langle \alpha^\vee, \sigma \rangle = 0\} \subseteq S^p \subseteq \{\alpha \in S : \langle \alpha^\vee, \sigma \rangle = 0\}.$$



2. Definition 2.5 combines the standard definition of spherical system, see [21, Section 2], with the requirement that it be spherically closed, see [21, Section 7.1] and [5, Section 2.4].  $\square$

As shown in [21], the set  $\Delta_{G/K}$  of colors and the Cartan pairing  $c$  of  $G/K$  are uniquely determined by  $\mathcal{S}_{G/K}$ , in the sense that they can be naturally identified with the set of colors of and the full Cartan pairing of  $\mathcal{S}_{G/K}$ , defined as follows. Let  $\mathcal{S} = (S^p, \Sigma, \mathbf{A})$  be a (spherically closed) spherical  $G$ -system. The *set of colors of  $\mathcal{S}$*  is the finite set  $\Delta$  obtained as the disjoint union  $\Delta = \Delta^a \cup \Delta^{2a} \cup \Delta^b$  where

- $\Delta^a = \mathbf{A}$ ,
- $\Delta^{2a} = \{D_\alpha : \alpha \in S \cap \frac{1}{2}\Sigma\}$ ,
- $\Delta^b = \{D_\alpha : \alpha \in S \setminus (S^p \cup \Sigma \cup \frac{1}{2}\Sigma)\} / \sim$ , where  $D_\alpha \sim D_\beta$  if  $\alpha$  and  $\beta$  are orthogonal and  $\alpha + \beta \in \Sigma$ .

The *full Cartan pairing of  $\mathcal{S}$*  is the  $\mathbb{Z}$ -bilinear map  $c: \mathbb{Z}\Delta \times \mathbb{Z}\Sigma \rightarrow \mathbb{Z}$  defined as:

$$c(D, \sigma) = \begin{cases} c(D, \sigma) & \text{if } D \in \Delta^a; \\ \frac{1}{2} \langle \alpha^\vee, \sigma \rangle & \text{if } D = D_\alpha \in \Delta^{2a}; \\ \langle \alpha^\vee, \sigma \rangle & \text{if } D = D_\alpha \in \Delta^b. \end{cases}$$

### 2.3 Augmentations

We continue to use  $K$  for a spherically closed spherical subgroup of  $G$ . By [21, Proposition 6.4] spherical homogeneous spaces  $G/H$  such that  $\bar{H}$ , the spherical closure of  $H$ , is equal to  $K$  are classified by their weight lattice, which is an augmentation of  $\mathcal{S}_{G/K}$ .

**Definition 2.7.** Let  $\mathcal{S} = (S^p, \Sigma, \mathbf{A})$  be a spherically closed spherical  $G$ -system with Cartan pairing  $c: \mathbb{Z}\mathbf{A} \times \mathbb{Z}\Sigma \rightarrow \mathbb{Z}$ . An *augmentation* of  $\mathcal{S}$  is a lattice  $\Lambda' \subset \Lambda$  endowed with a pairing  $c': \mathbb{Z}\mathbf{A} \times \Lambda' \rightarrow \mathbb{Z}$  such that  $\Lambda' \supset \Sigma$  and

- (a1)  $c'$  extends  $c$ ;
- (a2) if  $\alpha \in S \cap \Sigma$ , then  $c'(D_\alpha^+, \xi) + c'(D_\alpha^-, \xi) = \langle \alpha^\vee, \xi \rangle$  for all  $\xi \in \Lambda'$ ;
- ( $\sigma$ 1) if  $2\alpha \in 2S \cap \Sigma$ , then  $\alpha \notin \Lambda'$  and  $\langle \alpha^\vee, \xi \rangle \in 2\mathbb{Z}$  for all  $\xi \in \Lambda'$ ;
- ( $\sigma$ 2) if  $\alpha$  and  $\beta$  are orthogonal elements of  $S$  with  $\alpha + \beta \in \Sigma$ , then  $\langle \alpha^\vee, \xi \rangle = \langle \beta^\vee, \xi \rangle$  for all  $\xi \in \Lambda'$ ; and
- (s) if  $\alpha \in S^p$ , then  $\langle \alpha^\vee, \xi \rangle = 0$  for all  $\xi \in \Lambda'$ .

Let  $\Delta$  be the set of colors of  $\mathcal{S}$ . The *full Cartan pairing* of the augmentation is the  $\mathbb{Z}$ -bilinear map  $c' : \mathbb{Z}\Delta \times \Lambda' \rightarrow \mathbb{Z}$  given by

$$c'(D, \gamma) = \begin{cases} c'(D, \gamma) & \text{if } D \in \Delta^a; \\ \frac{1}{2} \langle \alpha^\vee, \gamma \rangle & \text{if } D = D_\alpha \in \Delta^{2a}; \\ \langle \alpha^\vee, \gamma \rangle & \text{if } D = D_\alpha \in \Delta^b. \end{cases} \quad (2.1)$$

□

**Remark 2.8.** By the definition of spherical closure,  $\Delta_{G/H}$  and  $\Delta_{G/\tilde{H}}$  are naturally identified and the full Cartan pairing  $\mathbb{Z}\Delta_{G/H} \times \Lambda(G/H) \rightarrow \mathbb{Z}$  on  $G/H$  is the full Cartan pairing of the augmentation corresponding to  $H$  (see Proposition 6.4 and the proof of Theorem 3 in [21]).

□

We state here, for future reference, the following consequence of [20, Theorem 2].

**Proposition 2.9.** Let  $G/H$  be a spherical homogeneous space with  $\Sigma^{sc}(G/H) = \Sigma$ . Then

$$\Sigma^N(G/H) = (\Sigma \setminus \Sigma_l) \cup 2\Sigma_l,$$

where  $\Sigma_l = \{\alpha \in \Sigma \cap S : c_{G/H}(D_\alpha^+, \gamma) = c_{G/H}(D_\alpha^-, \gamma) \text{ for all } \gamma \in \Lambda(G/H)\}$ .

□

**Proof.** This follows immediately from comparing [20, Theorem 2], which describes the relationship between  $\Sigma(G/H)$  and  $\Sigma^N(G/H)$  with [21, Lemma 7.1], which describes the relationship between  $\Sigma(G/H)$  and  $\Sigma^{sc}(G/H)$ . Note that [21, Lemma 7.1] can be deduced from [20] without appealing to Luna's conjecture. ■

## 2.4 Strictly convex colored cones and weight monoids of affine spherical varieties

An equivariant embedding of a spherical homogeneous space  $G/H$  as a dense orbit in a spherical  $G$ -variety (an embedding of  $G/H$ , for short) is called *simple* if it has only one closed orbit. Affine spherical varieties are simple.

If  $X$  is a simple embedding of the spherical homogeneous space  $G/H$ , let  $\mathcal{F}(X)$  be the set of colors of  $X$  containing the closed orbit (identified with elements of  $\Delta_{G/H}$ ), and let  $\mathcal{C}(X)$  be the cone in  $\text{Hom}(\Lambda(G/H), \mathbb{Q})$  generated by the valuations associated with the  $G$ -stable divisors of  $X$  (identified with elements of  $\mathcal{V}_{G/H}$ ) and by  $c(\mathcal{F}(X), \cdot)$ . The couple  $(\mathcal{C}(X), \mathcal{F}(X))$  is a strictly convex colored cone in the sense of the following definition.

A *strictly convex colored cone* is a couple  $(\mathcal{C}, \mathcal{F})$  where

- $\mathcal{F}$  is a subset of  $\Delta_{G/H}$  such that the subset  $c(\mathcal{F}, \cdot)$  of  $\text{Hom}(\Lambda(G/H), \mathbb{Q})$  does not contain 0,
- $\mathcal{C}$  is a strictly convex polyhedral cone in  $\text{Hom}(\Lambda(G/H), \mathbb{Q})$  which is generated by  $c(\mathcal{F}, \cdot)$  and finitely many elements of  $\mathcal{V}_{G/H}$  and whose relative interior intersects  $\mathcal{V}_{G/H}$ .

We recall from [17, Theorem 3.1] that simple embeddings  $X$  of the spherical homogeneous space  $G/H$  are classified by their strictly convex colored cones. By [17, Theorem 6.7], the simple embedding  $X$  is affine if and only if there exists a character  $\chi \in \Lambda(G/H)$  that is non-positive on  $\mathcal{V}_{G/H}$ , zero on  $\mathcal{C}(X)$  and  $c(\cdot, \chi)$  is strictly positive on  $\Delta_{G/H} \setminus \mathcal{F}(X)$ .

We gather some known results about the weight monoid of affine spherical varieties.

**Proposition 2.10.** If  $X$  is an affine spherical  $G$ -variety with weight monoid  $\Gamma(X)$  and open orbit  $G/H$ , then

- (a) the weight lattice of  $X$  (or of  $G/H$ ) is  $\mathbb{Z}\Gamma(X)$ ;
- (b) the set  $S_X^p$  (which is the same as  $S_{G/H}^p$ ) is equal to  $\{\alpha \in S : \langle \alpha^\vee, \gamma \rangle = 0 \text{ for all } \gamma \in \Gamma(X)\}$ ;
- (c) the dual cone  $\Gamma^\vee(X) := \{v \in \text{Hom}(\mathbb{Z}\Gamma(X), \mathbb{Q}) : \langle v, \gamma \rangle \geq 0 \text{ for all } \gamma \in \Gamma(X)\}$  to  $\Gamma(X)$  is a strictly convex polyhedral cone;
- (d) every ray of  $\Gamma^\vee(X)$  contains an element of  $c(\Delta_{G/H}, \cdot)$  or of  $\mathcal{V}_{G/H}$ ;
- (e)  $\Gamma^\vee(X)$  contains  $c(\Delta_{G/H}, \cdot)$ . □

**Proof.** These statements are well known to experts and can be extracted from the results summarized in [27, Section 15.1]. For the reader's convenience, we provide a proof. Assertion (a) follows from the fact that a rational  $B$ -eigenfunction on  $X$  is necessarily equal to the quotient of two regular  $B$ -eigenfunctions; see for example [10, Proposition 2.8(i)]. Assertion (b) is [12, Lemme 10.2]. It follows from the fact that  $P_X$  is the common stabilizer of the  $B$ -stable lines in  $\mathbb{k}[X]$ . This is the case because  $P_X$  is the common stabilizer of the  $B$ -stable prime divisors of  $X$  and the union of these divisors is the zero set of some  $B$ -eigenvector in  $\mathbb{k}[X]$ . Assertion (c) is a standard fact in convex geometry. Parts (d) and (e) follow from the fact that a rational  $B$ -eigenfunction on  $X$  is regular if and only if it does not have poles along the colors or  $G$ -stable prime divisors of  $X$ . This, in turn, is so because  $X$  is normal. ■

## 2.5 Adapted spherical roots

Recall that  $\Gamma$  is a normal submonoid of  $\Lambda^+$ . Combining the results recalled above, one derives the condition on a set of spherical roots  $\Sigma$  for being adapted to  $\Gamma$ .

**Definition 2.11.** We say that a subset  $\Sigma$  of  $\Sigma^{sc}(G)$  is *adapted* (or *N-adapted*) to  $\Gamma$  if there exists an affine spherical  $G$ -variety  $X$  such that  $\Gamma(X) = \Gamma$  and  $\Sigma^{sc}(X) = \Sigma$  (respectively,  $\Sigma^N(X) = \Sigma$ ).  $\square$

**Remark 2.12.** Let  $\Sigma$  be a subset of  $\Sigma^{sc}(G)$ . Losev's Theorem [19, Theorem 1.2] asserts that there is *at most one* affine spherical  $G$ -variety  $X$  with  $\Gamma(X) = \Gamma$  and  $\Sigma^N(X) = \Sigma$ . Because  $\Sigma^{sc}(X)$  determines  $\Sigma^N(X)$  (see Proposition 2.9) there is also at most one affine spherical  $G$ -variety  $Y$  with  $\Sigma^{sc}(Y) = \Sigma$  and  $\Gamma(Y) = \Gamma$ .  $\square$

The dual cone to  $\Gamma$  is

$$\Gamma^\vee := \{v \in \text{Hom}(\mathbb{Z}\Gamma, \mathbb{Q}) : \langle v, \gamma \rangle \geq 0 \text{ for all } \gamma \in \Gamma\}.$$

It is a strictly convex polyhedral cone. We denote the set of primitive vectors on its rays by  $E(\Gamma)$ :

$$E(\Gamma) := \{\delta \in (\mathbb{Z}\Gamma)^* : \delta \text{ spans a ray of } \Gamma^\vee \text{ and } \delta \text{ is primitive}\}. \quad (2.2)$$

Observe that

$$E(\Gamma) = \{\delta \in (\mathbb{Z}\Gamma)^* : \delta \text{ is primitive, } \delta(\Gamma) \subset \mathbb{Z}_{\geq 0}, \delta \text{ is the equation of a face of codimension 1 of } \mathbb{Q}_{\geq 0}\Gamma\}. \quad (2.3)$$

Moreover, for  $\alpha \in S \cap \mathbb{Z}\Gamma$ , we define

$$a(\alpha) := \{\delta \in (\mathbb{Z}\Gamma)^* : \delta(\alpha) = 1 \text{ and } (\delta \in E(\Gamma) \text{ or } \alpha^\vee - \delta \in E(\Gamma))\}.$$

Finally, we put

$$S^p(\Gamma) := \{\alpha \in S : \langle \alpha^\vee, \gamma \rangle = 0 \text{ for all } \gamma \in \Gamma\}.$$

**Proposition 2.13.** Let  $\Gamma$  be a normal submonoid of  $\Lambda^+$ . A subset  $\Sigma$  of  $\Sigma^{sc}(G)$  is adapted to  $\Gamma$  if and only if there exists a spherically closed spherical system  $\mathcal{S} = (S^p, \Sigma, \mathbf{A})$  such that

- (1)  $S^p = S^p(\Gamma)$ ; and
- (2)  $\mathbb{Z}\Gamma$  is an augmentation of  $\mathbb{Z}\Sigma$ ; and

- (3) if  $\delta \in E(\Gamma)$ , then  $\langle \delta, \sigma \rangle \leq 0$  for all  $\sigma \in \Sigma$  or there exists  $D \in \Delta$  such that  $c(D, \cdot)$  is a positive multiple of  $\delta$ ; where  $\Delta$  is the set of colors of  $\mathcal{S}$  and  $c: \mathbb{Z}\Delta \times \mathbb{Z}\Gamma \rightarrow \mathbb{Z}$  is the full Cartan pairing of the augmentation; and
- (4)  $c(D, \cdot) \in \Gamma^\vee$  for all  $D \in \Delta$ . □

**Proof.** This is a consequence of the results we reviewed in Sections 2.2–2.4. We begin with the *necessity* of the conditions. Let  $X$  be an affine spherical  $G$ -variety with  $\Sigma^{sc}(X) = \Sigma$  and  $\Gamma(X) = \Gamma$ . Let  $G/H$  be the open orbit of  $X$  and let  $\bar{H}$  be the spherical closure of  $H$ . Then  $\Sigma^{sc}(X) = \Sigma(G/\bar{H})$  by definition, and  $S_{G/H}^p = S^p(\Gamma)$  by Proposition 2.10(b). Moreover,  $S_{G/H}^p = S_{G/\bar{H}}^p$ . It follows from Section 5.1 and Lemma 7.1 in [21] that  $(S^p(\Gamma), \Sigma, \mathbf{A}_{G/\bar{H}})$  is a spherically closed spherical system. Since  $H$  has spherical closure  $\bar{H}$ , (2) follows from [21, Proposition 6.4]. Conditions (3) and (4) follow from (d) and (e) of Proposition 2.10.

We now show that the conditions are *sufficient* for  $\Sigma$  to be adapted to  $\Gamma$ . By [6] there exists a spherically closed spherical subgroup  $K$  of  $G$  with spherical system  $\mathcal{S}$ . Condition (2) implies by [21, Proposition 6.4] that there exists a spherical subgroup  $H$  of  $G$  with  $\bar{H} = K$  and  $\Lambda(G/H) = \mathbb{Z}\Gamma$ . What remains is to prove that  $G/H$  has an affine embedding  $X$  with weight monoid  $\Gamma$ . That is, by [17, Theorems 3.1 and 6.7] we have to show that there exists a strictly convex colored cone  $(\mathcal{C}, \mathcal{F})$  in  $\text{Hom}(\mathbb{Z}\Gamma, \mathbb{Q})$ , with respect to  $\mathcal{V} = \{v \in \text{Hom}(\mathbb{Z}\Gamma, \mathbb{Q}) : \langle v, \sigma \rangle \leq 0 \text{ for all } \sigma \in \Sigma\}$  and the set of colors  $\Delta$  of  $\mathcal{S}$ , such that

- (i) there exists  $\chi \in \mathbb{Z}\Gamma$  that is non-positive on  $\mathcal{V}$ , zero on  $\mathcal{C}$  and strictly positive on  $\Delta \setminus \mathcal{F}$ ; and
- (ii)  $\Gamma = \{\gamma \in \mathbb{Z}\Gamma : \langle v, \gamma \rangle \geq 0 \text{ for all } v \in \mathcal{C} \cup \Delta\}$ .

We claim that if (1), (3), and (4) hold, then the desired strictly convex colored cone exists. Indeed, take  $\mathcal{C}$  to be the maximal face of  $\Gamma^\vee$  whose relative interior meets  $\mathcal{V}$  with  $\mathcal{F}$  the set of colors contained in  $\mathcal{C}$  (such a maximal face exists since the zero face actually meets  $\mathcal{V}$ ). The set  $c(\mathcal{F}, \cdot)$  does not contain 0. Indeed, a color  $D$  with  $c(D, \cdot) = 0$  necessarily belongs to  $\Delta^b$ , whence  $c(D, \cdot) = \langle \alpha^\vee, \cdot \rangle$  for some  $\alpha \in S$  but by (1) this implies  $\alpha \in S^p$ . Moreover,  $\mathcal{C}$  is contained in a hyperplane that separates  $\mathcal{V}$  and  $\Delta \setminus \mathcal{F}$ . This yields  $\chi$ . The inclusion “ $\subset$ ” of (ii) holds because  $\mathcal{C} \subset \Gamma^\vee$  and because  $c(\Delta, \cdot) \subset \Gamma^\vee$  by (4). The other inclusion follows from (3) and the maximality of  $\mathcal{C}$ . ■

**Remark 2.14.** It follows from equation (2.4) below that the spherical system  $\mathcal{S}$  and the Cartan pairing of the augmentation in Proposition 2.13 are uniquely determined by  $\Gamma$  and  $\Sigma$ . □

**Corollary 2.15.** Let  $\Gamma$  be a normal submonoid of  $\Lambda^+$ . A subset  $\Sigma$  of  $\Sigma^{sc}(G)$  is  $N$ -adapted to  $\Gamma$  if and only if there exists a subset  $\tilde{\Sigma}$  of  $\Sigma^{sc}(G)$  which is adapted to  $\Gamma$  and such that  $\Sigma = (\tilde{\Sigma} \setminus \tilde{\Sigma}_l) \cup 2\tilde{\Sigma}_l$ , where  $\tilde{\Sigma}_l = \{\alpha \in \tilde{\Sigma} \cap S: a(\alpha) \text{ has one element}\}$ .  $\square$

**Proof.** This is a consequence of Propositions 2.13 and 2.9 once we show the following: if  $c$  is the full Cartan pairing of an augmentation  $\mathbb{Z}\tilde{\Sigma} \subset \mathbb{Z}\Gamma$  of a spherical system  $\mathcal{S} = (S^p(\Gamma), \tilde{\Sigma}, \mathbf{A})$  as in Proposition 2.13, then

$$a(\alpha) = \{c(D_\alpha^+, \cdot), c(D_\alpha^-, \cdot)\} \quad (2.4)$$

for all  $\alpha \in \tilde{\Sigma} \cap S$ . To prove the inclusion “ $\subset$ ” in (2.4), let  $\delta \in a(\alpha)$ . Then,  $\langle \delta, \alpha \rangle = \langle \alpha^\vee - \delta, \alpha \rangle = 1 > 0$  and at least one of  $\delta$  and  $\alpha^\vee - \delta$  is in  $E(\Gamma)$ . By (3) in Proposition 2.13 it follows that  $\{\delta, \alpha^\vee - \delta\}$  contains a positive rational multiple of  $c(D, \cdot)$  for some color  $D$ . By axiom (A1) of the spherical system  $\mathcal{S}$ , and the description (2.1) of  $c$ , the color  $D$  must be  $D_\alpha^+$  or  $D_\alpha^-$ . Since  $c(D_\alpha^+, \alpha) = c(D_\alpha^-, \alpha) = 1$ , this implies that the two sets  $\{\delta, \alpha^\vee - \delta\}$  and  $\{c(D_\alpha^+, \cdot), c(D_\alpha^-, \cdot)\}$  intersect, and so by axiom (a2) of the augmentation, they are equal. For the reverse inclusion in (2.4) we have to show that  $c(D_\alpha^+, \cdot)$  or  $c(D_\alpha^-, \cdot)$  belongs to  $E(\Gamma)$ . If neither belongs to  $E(\Gamma)$ , then by (3) and (4) in Proposition 2.13 together with the description (2.1) of  $c$  and axiom (A1) in Definition 2.5, each of them is a linear combination with positive rational coefficients of elements of  $\text{Hom}(\mathbb{Z}\Gamma, \mathbb{Q})$  which are nonpositive on  $\alpha$ . This contradicts the fact that  $c(D_\alpha^+, \alpha) = 1$  and finishes the proof of equation (2.4).  $\blacksquare$

As the next two corollaries show, one can characterize very explicitly whether a single spherical root is adapted (Corollary 2.16) or  $N$ -adapted (Corollary 2.17) to  $\Gamma$ . In a 2005 working document, Luna had proposed a statement like Corollary 2.16. We remark that while Proposition 2.13 and Corollary 2.15 depend on the full classification of wonderful varieties by spherical systems (Luna’s conjecture), the next two results only use the combinatorial classification of rank 1 wonderful varieties, which was obtained in [8] and also in [1].

**Corollary 2.16.** Let  $\Gamma$  be a normal submonoid of  $\Lambda^+$ . If  $\sigma \in \Sigma^{sc}(G)$ , then  $\sigma$  is adapted to  $\Gamma$  if and only if all of the following conditions hold:

- (1)  $\sigma \in \mathbb{Z}\Gamma$ ;
- (2)  $\sigma$  is compatible with  $S^p(\Gamma)$ ;

- (3) if  $\sigma \notin S$  and  $\delta \in E(\Gamma)$  such that  $\langle \delta, \sigma \rangle > 0$ , then there exists  $\beta \in S \setminus S^p(\Gamma)$  such that  $\beta^\vee$  is a positive multiple of  $\delta$ ;
- (4) if  $\sigma \in S$ , then
  - (a)  $a(\sigma)$  has one or two elements; and
  - (b)  $\langle \delta, \gamma \rangle \geq 0$  for all  $\delta \in a(\sigma)$  and all  $\gamma \in \Gamma$ ; and
  - (c)  $\langle \delta, \sigma \rangle \leq 1$  for all  $\delta \in E(\Gamma)$ ;
- (5) if  $\sigma = 2\alpha \in 2S$ , then  $\alpha \notin \mathbb{Z}\Gamma$  and  $\langle \alpha^\vee, \gamma \rangle \in 2\mathbb{Z}$  for all  $\gamma \in \Gamma$ ;
- (6) if  $\sigma = \alpha + \beta$  with  $\alpha, \beta \in S$  and  $\alpha \perp \beta$ , then  $\alpha^\vee = \beta^\vee$  on  $\Gamma$ . □

**Proof.** Let  $\sigma \in \Sigma^{sc}(G)$ . Define the triple  $\mathcal{S}$  by

$$\mathcal{S} := \begin{cases} (S^p(\Gamma), \{\sigma\}, \emptyset) & \text{if } \sigma \notin S; \\ (S^p(\Gamma), \{\sigma\}, \{D_\sigma^+, D_\sigma^-\}) & \text{if } \sigma \in S. \end{cases}$$

Let  $\Delta$  be the set of colors of  $\mathcal{S}$  (see Section 2.2) and let  $c: \mathbb{Z}\Delta \times \mathbb{Z}\Gamma$  be the bilinear pairing given by equation (2.1) if  $\sigma \notin S$  and by

$$\begin{aligned} c(D, \gamma) &= \langle \alpha^\vee, \gamma \rangle \text{ if } D = D_\alpha \in \Delta^b; \\ \{c(D_\sigma^+, \cdot), c(D_\sigma^-, \cdot)\} &= a(\sigma), \end{aligned} \tag{2.5}$$

if  $\sigma \in S$ . By Remark 2.14, we have to show that the conditions of the corollary hold if and only if  $\mathcal{S}$  is a spherically closed spherical system of which  $\mathbb{Z}\Gamma$  together with  $c$  is an augmentation such that conditions (3) and (4) of Proposition 2.13 hold. We briefly describe the straightforward verification.

We begin with the case  $\sigma \notin S$ . Then we have that  $\mathcal{S}$  is a spherically closed spherical  $G$ -system if and only if (2) holds. Then  $c$  gives an augmentation of  $\mathcal{S}$  if and only if (1), (5) and (6) hold. Condition (4) of Proposition 2.13 is vacuous since  $\Gamma \subset \Lambda^+$  and every  $c(D, \cdot)$  is a positive multiple of a coroot. Condition (3) in the corollary is the same as condition (3) of Proposition 2.13 by the definition of  $c$ .

We proceed to the case  $\sigma \in S$ . Now  $\mathcal{S}$  is a spherically closed spherical  $G$ -system if and only if (2) and (a) hold. Next, by construction,  $c$  gives an augmentation of  $\mathcal{S}$  if and only if we have (1). Condition (4) of Proposition 2.13 is equivalent to (b). Finally, condition (3) of Proposition 2.13 is equivalent to (c), again by the definition of  $c$ . ■

The combinatorial conditions that characterize  $N$ -adapted spherical roots are exactly the same except for conditions (a) and (5). We report all of them again entirely in the next statement for later reference.

**Corollary 2.17.** Let  $\Gamma$  be a normal submonoid of  $\Lambda^+$ . If  $\sigma \in \Sigma^{sc}(G)$ , then  $\sigma$  is  $N$ -adapted to  $\Gamma$  if and only if all of the following conditions hold:

- (1)  $\sigma \in \mathbb{Z}\Gamma$ ;
- (2)  $\sigma$  is compatible with  $S^p(\Gamma)$ ;
- (3) if  $\sigma \notin S$  and  $\delta \in E(\Gamma)$  such that  $\langle \delta, \sigma \rangle > 0$ , then there exists  $\beta \in S \setminus S^p(\Gamma)$  such that  $\beta^\vee$  is a positive multiple of  $\delta$ ;
- (4) if  $\sigma \in S$ , then
  - (a)  $a(\sigma)$  has two elements; and
  - (b)  $\langle \delta, \gamma \rangle \geq 0$  for all  $\delta \in a(\sigma)$  and all  $\gamma \in \Gamma$ ; and
  - (c)  $\langle \delta, \sigma \rangle \leq 1$  for all  $\delta \in E(\Gamma)$ ;
- (5) if  $\sigma = 2\alpha \in 2S$ , then  $\langle \alpha^\vee, \gamma \rangle \in 2\mathbb{Z}$  for all  $\gamma \in \Gamma$ ;
- (6) if  $\sigma = \alpha + \beta$  with  $\alpha, \beta \in S$  and  $\alpha \perp \beta$ , then  $\alpha^\vee = \beta^\vee$  on  $\Gamma$ . □

**Proof.** By Corollary 2.15, if  $\sigma \notin S \cup 2S$ , then  $\sigma$  is adapted to  $\Gamma$  if and only if it is  $N$ -adapted to  $\Gamma$ . From the same corollary it follows that  $\sigma \in S$  is  $N$ -adapted to  $\Gamma$  if and only if it is adapted to  $\Gamma$  and  $a(\sigma)$  has two elements. The only remaining case is  $\sigma = 2\alpha$  for some  $\alpha \in S$ . Again by Corollary 2.15,  $2\alpha$  is  $N$ -adapted to  $\Gamma$  if and only if either

- (i)  $2\alpha$  is adapted to  $\Gamma$ ; or
- (ii)  $\alpha$  is adapted to  $\Gamma$  and  $a(\alpha)$  has one element.

We assume that (1) and (2) hold and claim that (3) and (5) hold if and only if (i) or (ii) is true. Indeed, it is clear from Corollary 2.16 that if  $2\alpha$  is adapted to  $\Gamma$ , then we have (3) and (5). On the other hand, if  $\alpha$  is adapted to  $\Gamma$  and  $a(\alpha)$  has one element, then that element is  $\frac{1}{2}\alpha^\vee$  and so (5) holds. Moreover, condition (c) of Corollary 2.16 implies (3) of this corollary. Conversely, suppose that we have (3) and (5). Since the restriction of  $\alpha^\vee$  to  $\mathbb{Z}\Gamma$  belongs to  $\Gamma^\vee$  and  $\langle \alpha^\vee, 2\alpha \rangle > 0$ , there exists  $\delta \in E(\Gamma)$  such that  $\langle \delta, 2\alpha \rangle > 0$ . It follows from (3) that  $\delta = q\beta^\vee$  for some  $\beta \in S \setminus S^p(\Gamma)$  and  $q \in \mathbb{Q}_{>0}$ . Clearly,  $\beta = \alpha$ , which proves that  $\delta$  is the only element of  $E(\Gamma)$  that takes a positive value on  $2\alpha$ . Now, suppose that  $2\alpha$  is not adapted to  $\Gamma$ , that is, that (i) does not hold. Then  $\alpha$  must be an element of  $\mathbb{Z}\Gamma$ . By (5),  $\frac{1}{2}\alpha^\vee$  takes integer values on  $\mathbb{Z}\Gamma$ , and since it takes value 1 on  $\alpha$ , it is primitive



in  $(\mathbb{Z}\Gamma)^*$  and therefore an element of  $E(\Gamma)$  and the only element of  $a(\alpha)$ . It follows from Corollary 2.16 that (ii) is true. This finishes the proof. ■

### 3 The $T_{\text{ad}}$ -Weights in $(V/\mathfrak{g} \cdot x_0)^{G_{x_0}}$

For the remainder of the paper,  $\Gamma$  will be a free monoid with basis  $F \subset \Lambda^+$ . In this section, we begin by recalling that the moduli scheme  $M_\Gamma$  is an open subscheme of a certain invariant Hilbert scheme  $H_\Gamma$ . This allows one to realize the tangent space  $T_{x_0}M_\Gamma$  as a  $T$ -submodule of a certain vector space  $(V/\mathfrak{g} \cdot x_0)^{G_{x_0}}$ . In Section 3.2, we prove that if  $\gamma$  is a  $T$ -weight in  $(V/\mathfrak{g} \cdot x_0)^{G_{x_0}}$ , then it is a spherical root of spherically closed type. In Section 3.3, we further show that  $\gamma$  is compatible with  $S^p(\Gamma)$ . We also show that if  $\gamma \notin S$ , then the weight space  $(V/\mathfrak{g} \cdot x_0)^{G_{x_0}}_{(\gamma)}$  has dimension at most 1. For notational and computational convenience, we actually work with the opposite of Alexeev and Brion's  $T$ -action on  $M_\Gamma$  and with a twist of their action on  $H_\Gamma$  (see Section 3.1).

#### 3.1 The invariant Hilbert scheme and its tangent space

We briefly review some known facts regarding  $M_\Gamma$  and its relation to a certain invariant Hilbert scheme  $H_\Gamma$ . For more details we refer the reader to [2, 11, Section 4.3] and to [23, Sections 2.1 and 2.2]. Recall that  $\Gamma$  is a free monoid of dominant weights with basis  $F = \{\lambda_1, \lambda_2, \dots, \lambda_r\}$ , and put

$$V := V(\lambda_1) \oplus V(\lambda_2) \oplus \dots \oplus V(\lambda_r);$$

$$x_0 := v_{\lambda_1} + v_{\lambda_2} + \dots + v_{\lambda_r}.$$

We denote by  $H_\Gamma$  the Hilbert scheme  $\text{Hilb}_h^G(V)$  of [2], where  $h$  is the characteristic function of  $\Gamma^* := -w_0\Gamma$  (where  $w_0$  is the longest element in the Weyl group of  $G$ ). The scheme  $H_\Gamma$  parametrizes the  $G$ -stable ideals  $I$  of  $\mathbb{k}[V]$  such that  $\mathbb{k}[V]/I \simeq \bigoplus_{\lambda \in \Gamma^*} V(\lambda)$  as  $G$ -modules. We equip  $H_\Gamma$  with the action of  $T$  described in [23, Section 2.2]. This is the same action as in [4], and is a “twist” of the action in [2] and in [11, p. 101]. We briefly recall its definition. Let  $\text{GL}(V)^G$  be the group of linear automorphisms of  $V$  that commute with the action of  $G$ . Note that  $\text{GL}(V)^G$  is a torus of dimension  $r$ . The natural action of  $\text{GL}(V)^G$  on  $V$  (by  $G$ -equivariant automorphisms) induces an action on  $H_\Gamma$ . Composing with the homomorphism

$$T \rightarrow \text{GL}(V)^G : t \mapsto (\lambda_1(t), \lambda_2(t), \dots, \lambda_r(t)), \quad (3.1)$$

we obtain our action of  $T$  on  $H_\Gamma$ .

The center  $Z(G)$  of  $G$  belongs to the kernel of this action, which therefore descends to an action of  $T_{\text{ad}} := T/Z(G)$ . We will refer to our action as the “ $T_{\text{ad}}$ -action” on  $H_r$ . For the reader’s convenience, the corresponding  $T_{\text{ad}}$ -action induced on the tangent space to  $H_r$  at the  $T_{\text{ad}}$ -fixed point is recalled below in (3.3). As was reviewed in [23, Section 2.2] it follows from [2, Corollary 1.17, Lemma 2.2] that since  $\Gamma^*$  is free, we can view  $M_{\Gamma^*}$  as a  $T_{\text{ad}}$ -stable open subscheme of  $H_r$ . Under this identification, the  $T_{\text{ad}}$ -fixed point  $X_0$  of  $M_{\Gamma^*}$  corresponds to a certain subvariety of  $V$  which we also denote by  $X_0$ , namely

$$X_0 = \text{the closure of the } G\text{-orbit of } x_0 \text{ in } V. \quad (3.2)$$

The next proposition relates  $M_r$  to  $H_r$ .

**Proposition 3.1.** Let  $\Gamma$  be a free monoid of dominant weights. If we equip  $M_r$  with the opposite of the  $T_{\text{ad}}$ -action in [2] and  $H_r$  with the  $T_{\text{ad}}$ -action in [23, Section 2.2], then there is a  $T_{\text{ad}}$ -equivariant open embedding

$$M_r \hookrightarrow H_r$$

which sends the unique  $T_{\text{ad}}$ -fixed point of  $M_r$  to the point  $X_0$  in equation (3.2).  $\square$

**Proof.** This is a matter of “formal bookkeeping.” Composing the action of  $G$  on  $V(\Gamma)$  with the Chevalley involution of  $G$  induces an isomorphism  $M_r \simeq M_{\Gamma^*}$ . Composing this isomorphism with the open  $T_{\text{ad}}$ -equivariant embedding  $M_{\Gamma^*} \hookrightarrow H_r$  chosen above gives an open embedding  $M_r \hookrightarrow H_r$ . Comparing the definition of the action in [2] with that of the action in [23, Section 2.2] one shows that this open embedding is  $T_{\text{ad}}$ -equivariant for the actions as given in the proposition.  $\blacksquare$

**Remark 3.2.** In what follows,  $M_r$  and  $H_r$  will always be equipped with the actions given in Proposition 3.1. The action Alexeev and Brion defined on  $M_r$  is conceptually the most natural, while we find the action we are using on  $H_r$  computationally more convenient.  $\square$

By [2, Proposition 1.13], there is a canonical isomorphism

$$T_{X_0} H_r \simeq H^0(X_0, \mathcal{N}_{X_0|V})^G$$

where  $H^0(X_0, \mathcal{N}_{X_0|V})^G$  is the space of  $G$ -invariant global sections of the normal sheaf  $\mathcal{N}_{X_0|V}$  of  $X_0$  in  $V$ . Moreover, by [11, Proposition 3.10], there is an inclusion of  $T_{\text{ad}}$ -modules

$$H^0(X_0, \mathcal{N}_{X_0|V})^G \hookrightarrow (V/\mathfrak{g} \cdot x_0)^{G_{x_0}} \simeq H^0(G \cdot x_0, \mathcal{N}_{G \cdot x_0|V})^G,$$

where the  $T_{\text{ad}}$ -action on  $(V/\mathfrak{g} \cdot x_0)^{G_{x_0}}$  is induced by the following action of  $T_{\text{ad}}$  on  $V$ . For  $t \in T_{\text{ad}}$  and  $v$  a  $T$ -weight vector of weight  $\delta$  in  $V(\lambda) \subset V$ , we put

$$t \cdot v := \lambda(t) \delta(t)^{-1} v. \quad (3.3)$$

### 3.2 The $T_{\text{ad}}$ -weights in $(V/\mathfrak{g} \cdot x_0)^{G_{x_0}}$ are spherical roots of $G$

In this section, we prove the following theorem.

**Theorem 3.3.** If  $\gamma$  is a  $T_{\text{ad}}$ -weight in  $(V/\mathfrak{g} \cdot x_0)^{G_{x_0}}$ , then  $\gamma$  is a spherically closed spherical root of  $G$ .  $\square$

**Proof.** Corollaries 3.8 and 3.14.  $\blacksquare$

For future use, we recall the following elementary and well-known facts regarding  $(V/\mathfrak{g} \cdot x_0)^{G_{x_0}}$ . We include proofs for convenience. Before stating them we define

$$F^\perp := \{\beta \in R^+ : \langle \lambda, \beta^\vee \rangle = 0 \text{ for all } \lambda \in F\}.$$

**Proposition 3.4.**

- (a) A basis of  $T_{\text{ad}}$ -eigenvectors of  $\mathfrak{g} \cdot x_0$  is given by  $\{v_\lambda : \lambda \in F\} \cup \{X_{-\beta} \cdot x_0 : \beta \in R^+ \setminus F^\perp\}$ .
- (b) If  $[v]$  is a  $T_{\text{ad}}$ -eigenvector in  $V/\mathfrak{g} \cdot x_0$  of weight  $\gamma$ , then  $[v] \in (V/\mathfrak{g} \cdot x_0)^{G_{x_0}}$  if and only if  $\gamma \in \mathbb{Z}\Gamma$  and  $X_\beta \cdot v \in \mathfrak{g} \cdot x_0$  for all  $\beta \in S \cup -(S \cap F^\perp)$ .  $\square$

**Proof.** Assertion (a) follows from the fact that  $\mathfrak{g} \cdot x_0 = \mathfrak{b}^- \cdot x_0 = \mathfrak{t} \cdot x_0 + \mathfrak{n}^- \cdot x_0$  and that  $F$  is linearly independent. Assertion (b) follows from [23, Lemma 2.16] and the fact that  $\mathfrak{g}_{x_0}$  is generated as a Lie algebra by  $\mathfrak{t}_{x_0}$  and the root spaces  $\mathfrak{g}_\beta$  with  $\beta \in S \cup -(S \cap F^\perp)$  (see, e.g., [15, Theorem 30.1]).  $\blacksquare$

*In the remainder of this section,  $\gamma$  is a  $T_{\text{ad}}$ -weight occurring in  $(V/\mathfrak{g} \cdot x_0)^{G_{x_0}}$  and  $v \in V$  a  $T_{\text{ad}}$ -eigenvector of weight  $\gamma$  such that  $[v]$  is a nonzero element of  $(V/\mathfrak{g} \cdot x_0)^{G_{x_0}}$ . By Proposition 3.4 (and the choice of our  $T_{\text{ad}}$ -action), the weight  $\gamma$  belongs to  $\mathbb{N}S \cap \mathbb{Z}\Gamma$ .*

**Lemma 3.5** ([4, Lemma 3.3]).

- (1) There exists at least one simple root  $\alpha$  such that  $X_\alpha v \neq 0$ .
- (2) If  $\alpha$  is a simple root such that  $X_\alpha v \neq 0$  and  $\gamma \neq \alpha$ , then  $\gamma - \alpha$  is a positive root.

- (3) If  $\alpha$  is a simple root such that  $\gamma - \alpha$  is a root, then there exists  $z \in \mathbb{k}$  such that  $X_\alpha v = z X_{-\gamma+\alpha} x_0$ .  $\square$

**Proof.** The vector  $v$  cannot be a linear combination of the highest weight vectors  $v_{\lambda_i}$ , otherwise (since the weights  $\lambda_i$  are linearly independent) it would belong to  $\mathfrak{t} \cdot x_0 \subset \mathfrak{g} \cdot x_0$ . Moreover, since  $X_\alpha \in \mathfrak{g}_{x_0}$  for all  $\alpha \in S$ ,  $X_\alpha v$  is a  $T_{\text{ad}}$ -eigenvector of weight  $\gamma - \alpha$  in  $\mathfrak{g} \cdot x_0$ . ■

We first deal with the case where  $\gamma$  is a root. Note that since  $\gamma \in \mathbb{N}S$ , it is then a positive root. As is well known, we then also have that  $\text{supp}(\gamma)$  is a connected subset of the Dynkin diagram of  $G$ .

**Lemma 3.6.** If  $\gamma$  is a root, which is not simple, then there exist at least two distinct simple roots  $\alpha$  such that  $\gamma - \alpha$  is a root.  $\square$

**Proof.** Assume that there exists only one simple root  $\alpha$  such that  $\gamma - \alpha$  is a root. By Lemma 3.5, there exists  $z \in \mathbb{k}$  such that  $X_\alpha v = z X_{-\gamma+\alpha} x_0$ . Moreover, there exists  $z' \in \mathbb{k}^\times$  such that  $[X_\alpha, X_{-\gamma}] = z' X_{-\gamma+\alpha}$ . Therefore, if we put  $z'' = z/z'$ , then  $X_\alpha(v + z'' X_{-\gamma} x_0) = 0$ . Since  $[v] = [v + z'' X_{-\gamma} x_0]$  in  $V/\mathfrak{g} \cdot x_0$  we can assume that  $X_\alpha v = 0$ . Since  $\gamma - \alpha'$  is not a positive root for all  $\alpha' \in S \setminus \{\alpha\}$ , it then follows that  $X_\alpha v = 0$  for all  $\alpha \in S$ , which contradicts Lemma 3.5(1). ■

**Proposition 3.7.** If  $\gamma$  is a root, of which the support is not of type  $G_2$ , then it is a locally dominant short root, that is, the dominant short root in the root subsystem generated by the simple roots of its support.  $\square$

**Proof.** (I) Let  $\alpha_1$  and  $\alpha_2$  be two orthogonal simple roots such that  $\gamma - \alpha_1$  and  $\gamma - \alpha_2$  are roots. Note that  $\gamma - \alpha_1 - \alpha_2$  is also a root. We claim that if there exists  $\lambda \in F$  not orthogonal to  $\gamma - \alpha_1 - \alpha_2$ , then we can assume

$$X_{\alpha_1} v = X_{\alpha_2} v = 0. \quad (3.4)$$

Indeed, there exist  $z_1, z_2 \in \mathbb{k}^\times$  such that

$$[X_{\alpha_1}, X_{-\gamma}] = z_1 X_{-\gamma+\alpha_1};$$

$$[X_{\alpha_2}, X_{-\gamma}] = z_2 X_{-\gamma+\alpha_2}.$$

Moreover, using the Jacobi identity and the fact that  $[X_{\alpha_1}, X_{\alpha_2}] = 0$  one finds that

$$[X_{\alpha_2}, X_{-\gamma+\alpha_1}] = \frac{z_2}{z_1} [X_{\alpha_1}, X_{-\gamma+\alpha_2}].$$

By Lemma 3.5(3), there exist  $z'_1, z'_2 \in \mathbb{k}$  such that

$$X_{\alpha_1} v = z'_1 X_{-\gamma+\alpha_1} x_0;$$

$$X_{\alpha_2} v = z'_2 X_{-\gamma+\alpha_2} x_0.$$

Since  $X_{\alpha_2} X_{\alpha_1} v = X_{\alpha_1} X_{\alpha_2} v$  we obtain that

$$\left( \frac{z_2}{z_1} z'_1 - z'_2 \right) [X_{\alpha_1}, X_{-\gamma+\alpha_2}] x_0 = 0.$$

Using that there exists  $\lambda \in F$  not orthogonal to the root  $\gamma - \alpha_1 - \alpha_2$  it follows that  $\frac{z_2}{z_1} z'_1 - z'_2 = 0$ , that is

$$\frac{z'_1}{z_1} = \frac{z'_2}{z_2}.$$

This implies that by replacing  $v$  by  $v - \frac{z'_1}{z_1} X_{-\gamma} x_0 = v - \frac{z'_2}{z_2} X_{-\gamma} x_0$ , we can assume (3.4).

(II) The same can be done if we have  $\alpha_1, \alpha_2, \dots, \alpha_k$  simple roots with  $\alpha_j$  orthogonal to  $\alpha_{j+1}$  for all  $j \in \{1, 2, \dots, k-1\}$  and such that  $\gamma - \alpha_j$  is a root for all  $j \in \{1, 2, \dots, k\}$ . More precisely, we claim that if there exists  $\lambda \in F$  not orthogonal to  $\gamma - \alpha_1 - \dots - \alpha_k$ , then we can assume that for all  $j \leq k$

$$X_{\alpha_j} v = 0. \quad (3.5)$$

Indeed, for every  $j \in \{1, 2, \dots, k\}$  there exists, as in Part I,  $z_j \in \mathbb{k}^\times$  and  $z'_j \in \mathbb{k}$  such that  $[X_{\alpha_j}, X_{-\gamma}] = z_j X_{-\gamma+\alpha_j}$  and  $X_{\alpha_j} v = z'_j X_{-\gamma+\alpha_j} x_0$ . Let  $\lambda$  be an element of  $F$  that is not orthogonal to  $\gamma - \alpha_1 - \dots - \alpha_k$ . Then  $\lambda$  is not orthogonal to  $\gamma - \alpha_j - \alpha_{j+1}$  for all  $j \in \{1, 2, \dots, k-1\}$ . By applying Part I  $(k-1)$  times to the pairs  $\alpha_j, \alpha_{j+1}$  we obtain that

$$\frac{z'_1}{z_1} = \frac{z'_2}{z_2} = \dots = \frac{z'_k}{z_k}.$$

This implies that by replacing  $v$  by  $v - \frac{z'_1}{z_1} X_{-\gamma} x_0$ , we can assume (3.5).

(III) Assume that there exist more than two simple roots, say  $\alpha_1, \dots, \alpha_k$ , such that  $\gamma - \alpha_j$  is a root for all  $j \in \{1, 2, \dots, k\}$ . We claim that they can be reordered such that  $\alpha_j$  is orthogonal to  $\alpha_{j+1}$  for all  $j < k$  as in part II.

This can be verified by making use of the classification of root systems, checking case-by-case all the positive roots, noticing along the way (although we will not need this) that  $k$  is at most 3. This is straightforward for the classical types. To avoid the large number of case-by-case checkings in the exceptional types  $E_6, E_7, E_8$ , and  $F_4$  one can use

for example the following argument. If it were not possible to reorder the simple roots  $\alpha_1, \dots, \alpha_k$  as required, then there would exist three roots among them, say  $\alpha_{j_1}, \alpha_{j_2}, \alpha_{j_3}$ , such that  $\alpha_{j_2}$  is not orthogonal to both  $\alpha_{j_1}$  and  $\alpha_{j_3}$ . We will now show that this is impossible for each exceptional type using well-known properties of root systems of rank 2 and 3. Note, in particular, that if the support of  $\gamma$  is not of type  $G_2$  and if  $\gamma - \alpha$  is a root for some simple root  $\alpha$ , then

$$\langle \alpha^\vee, \gamma \rangle \geq 0$$

since otherwise there would exist a root string of length greater than 3.

In types  $E_6, E_7$ , and  $E_8$  all the roots have the same length so we would necessarily have  $\langle (\alpha_{j_m})^\vee, \gamma \rangle = 1$  for  $m \in \{1, 2, 3\}$ , but this is absurd since it would mean that  $\langle (\alpha_{j_1} + \alpha_{j_2} + \alpha_{j_3})^\vee, \gamma \rangle = 3$ . In type  $F_4$ , the three simple roots would generate a root subsystem of type  $B_3$  or of type  $C_3$ . In the former case (type  $B_3$ ) we would necessarily have  $\langle (\alpha_{j_1})^\vee, \gamma \rangle = \langle (\alpha_{j_2})^\vee, \gamma \rangle = 1$  assuming  $\alpha_{j_1}$  and  $\alpha_{j_2}$  are long, but this is absurd since it would mean  $\langle (\alpha_{j_1} + \alpha_{j_2} + \alpha_{j_3})^\vee, \gamma \rangle \geq 4$ . In the latter case (type  $C_3$ ) we would necessarily have  $\langle (\alpha_{j_1})^\vee, \gamma \rangle = 1$  assuming  $\alpha_{j_1}$  is long. If  $\langle (\alpha_{j_3})^\vee, \gamma \rangle$  is positive, then  $\langle (\alpha_{j_1} + \alpha_{j_2} + \alpha_{j_3})^\vee, \gamma \rangle$  is greater than 2, which is not possible in type  $F_4$ . If  $\langle (\alpha_{j_3})^\vee, \gamma \rangle = 0$ , then  $\gamma + \alpha_{j_3}$  is a root, and  $\langle (\alpha_{j_1} + \alpha_{j_2} + \alpha_{j_3})^\vee, \gamma + \alpha_{j_3} \rangle$  is greater than 2, which is again absurd.

(IV) We now want to prove that  $\gamma$  is locally dominant (if the support of  $\gamma$  is not of type  $G_2$ ). The fact that  $\gamma$  is locally short then follows. Indeed, if the support of  $\gamma$  is not simply laced, then the highest root in the root system generated by that support does not satisfy Lemma 3.6:

- in type  $B_n$ ,  $n \geq 2$ , the highest root is  $\alpha_1 + 2(\alpha_2 + \dots + \alpha_n) = \omega_2$ ;
- in type  $C_n$ ,  $n \geq 3$ , the highest root is  $2(\alpha_1 + \dots + \alpha_{n-1}) + \alpha_n = 2\omega_1$ ;
- in type  $F_4$  the highest root is  $2\alpha_1 + 3\alpha_2 + 4\alpha_3 + 2\alpha_4 = \omega_1$ .

To obtain a contradiction we assume that  $\gamma$  is not locally dominant, that is, we assume that there exists  $\beta \in \text{supp}(\gamma)$  such that  $\langle \beta^\vee, \gamma \rangle < 0$ . Recall from Part III that in type different from  $G_2$  if  $\gamma - \alpha$  is a root for a simple root  $\alpha$ , then  $\langle \alpha^\vee, \gamma \rangle \geq 0$ .

Suppose first that there are exactly  $k > 2$  simple roots, say  $\alpha_1, \dots, \alpha_k$ , such that  $\gamma - \alpha_j$  is a root for all  $j \leq k$ . From the assumption that  $\gamma$  is not locally dominant, it follows that there exists  $\lambda \in F$  not orthogonal to  $\gamma - \alpha_1 - \dots - \alpha_k$ . By Parts II and III, we can then assume that  $X_{\alpha_j} v = 0$  for all  $j \leq k$ . This contradicts Lemma 3.5(1).

If there are exactly two simple roots  $\alpha_1$  and  $\alpha_2$  such that  $\gamma - \alpha_1$  and  $\gamma - \alpha_2$  are roots, and  $\alpha_1$  and  $\alpha_2$  are orthogonal, then by Part I we get the same contradiction with Lemma 3.5(1).

Furthermore, if the support of  $\gamma$  has cardinality  $\leq 2$ , then the proposition follows by Lemma 3.6. Indeed, the only roots with support of cardinality  $\leq 2$  satisfying Lemma 3.6 are:

- with support of type  $A_1, \alpha_1$ ,
- with support of type  $A_2, \alpha_1 + \alpha_2$ ,
- with support of type  $B_2, \alpha_1 + \alpha_2$ .

Therefore, we now restrict to the case of support of  $\gamma$  of cardinality  $> 2$ , and assume that there are only two simple roots  $\alpha_1$  and  $\alpha_2$ , such that  $\gamma - \alpha_1$  and  $\gamma - \alpha_2$  are roots, and that  $\alpha_1$  and  $\alpha_2$  are not orthogonal. Note that  $\alpha_1 + \alpha_2$  is a root. Up to exchanging  $\alpha_1$  and  $\alpha_2$  we can assume that

$$\langle \alpha_2^\vee, \gamma \rangle > 0 \quad \text{and} \quad \alpha_1 + 2\alpha_2 \notin R. \quad (3.6)$$

Indeed, at least one of the two  $\langle \alpha_1^\vee, \gamma \rangle$  and  $\langle \alpha_2^\vee, \gamma \rangle$  must be positive (otherwise  $\gamma$  would be antidominant), and  $2\alpha_1 + \alpha_2$  and  $\alpha_1 + 2\alpha_2$  cannot both be roots. If say  $2\alpha_1 + \alpha_2$  is a root, then  $\|\alpha_1\| < \|\alpha_2\|$ , hence  $\alpha_2$  is long and therefore  $\langle \alpha_2^\vee, \gamma \rangle$  must be  $> 0$ .

Under (3.6) we have

$$\langle \alpha_2^\vee, \gamma - \alpha_1 \rangle \geq 1 + 1$$

hence  $\gamma - \alpha_1 - \alpha_2$  and  $\gamma - \alpha_1 - 2\alpha_2$  are roots. Since  $\gamma$  is not locally dominant, there is an element  $\lambda$  of  $F$  such that  $\langle (\gamma - \alpha_1 - 2\alpha_2)^\vee, \lambda \rangle \neq 0$ .

To conclude the proof of the proposition, we use once again an argument similar to that of Part I. Indeed, we will show in Part V that we can assume that  $X_{\alpha_1}v = X_{\alpha_2}v = 0$ , which contradicts Lemma 3.5(1).

(V) We finish by proving the following claim: if  $\alpha_1$  and  $\alpha_2$  are simple roots such that

- $\alpha_1 + 2\alpha_2$  is not a root;
- $\gamma - \alpha_1, \gamma - \alpha_2, \gamma - \alpha_1 - \alpha_2$ , and  $\gamma - \alpha_1 - 2\alpha_2$  are roots; and
- $\langle (\gamma - \alpha_1 - 2\alpha_2)^\vee, \lambda \rangle \neq 0$  for some  $\lambda \in F$ ; then

we can assume that  $X_{\alpha_1}v = X_{\alpha_2}v = 0$ .

Since  $\alpha_1 + 2\alpha_2$  is not a root we have that  $[X_{\alpha_2}, X_{\alpha_1 + \alpha_2}] = 0$ . By the third assumption of the claim,

$$X_{-(\gamma - \alpha_1 - 2\alpha_2)}x_0 \neq 0. \quad (3.7)$$

We first show that we can assume that

$$X_{\alpha_2} v = X_{\alpha_1 + \alpha_2} v = 0. \quad (3.8)$$

There exist  $z'_1, z'_2 \in \mathbb{k}$  such that

$$\begin{aligned} X_{\alpha_2} v &= z'_1 X_{-(\gamma - \alpha_2)} x_0; \\ X_{\alpha_1 + \alpha_2} v &= z'_2 X_{-(\gamma - \alpha_1 - \alpha_2)} x_0. \end{aligned}$$

Next, there exist  $z_1, z_2 \in \mathbb{k}^\times$  such that

$$\begin{aligned} [X_{\alpha_2}, X_{-\gamma}] &= z_1 X_{-(\gamma - \alpha_2)}; \\ [X_{\alpha_1 + \alpha_2}, X_{-\gamma}] &= z_2 X_{-(\gamma - \alpha_1 - \alpha_2)}. \end{aligned}$$

As in Part I, one deduces from  $X_{\alpha_2} X_{\alpha_1 + \alpha_2} v = X_{\alpha_1 + \alpha_2} X_{\alpha_2} v$  that

$$\left( \frac{z_2}{z_1} z'_1 - z'_2 \right) [X_{\alpha_2}, X_{-(\gamma - \alpha_1 - \alpha_2)}] x_0 = 0.$$

Using (3.7), it follows that

$$\frac{z'_1}{z_1} = \frac{z'_2}{z_2}. \quad (3.9)$$

Hence, if we replace  $v$  by  $v - \frac{z'_1}{z_1} X_{-\gamma} x_0 = v - \frac{z'_2}{z_2} X_{-\gamma} x_0$ , then equations (3.8) hold.

We now complete the proof by showing that (3.8) implies that

$$X_{\alpha_1} v = 0. \quad (3.10)$$

There exists  $z \in \mathbb{k}$  such that  $X_{\alpha_1} v = z X_{-(\gamma - \alpha_1)} x_0$ . From (3.8) we have that

$$0 = X_{\alpha_1 + \alpha_2} v = X_{\alpha_2} X_{\alpha_1} v = z X_{\alpha_2} X_{-(\gamma - \alpha_1)} x_0 = z X_{-(\gamma - \alpha_1 - \alpha_2)} x_0,$$

where the second equality uses that  $X_{\alpha_2} v = 0$  and the fourth one uses that  $X_{\alpha_2} x_0 = 0$ . Since equation (3.7) implies that  $X_{\alpha_2} X_{-(\gamma - \alpha_1 - \alpha_2)} x_0 \neq 0$ , we have that  $X_{-(\gamma - \alpha_1 - \alpha_2)} x_0 \neq 0$ , and therefore that  $z = 0$  which proves equation (3.10), the claim at the start of Part V and the proposition. ■

The following is Theorem 3.3 for the case that  $\gamma$  is a root.

**Corollary 3.8.** Let  $\gamma$  be a  $T_{\text{ad}}$ -weight in  $(V/\mathfrak{g} \cdot x_0)^{G_{x_0}}$ . If  $\gamma$  is a root, then  $\gamma$  is a spherically closed spherical root of  $G$ . □



**Proof.** If the support of  $\gamma$  is not of type  $G_2$ , then by Proposition 3.7 we have only to check the locally dominant short roots. The following roots do not satisfy Lemma 3.6.

- With support of type  $D_n$ ,  $n \geq 4$ :  $\alpha_1 + 2(\alpha_2 + \cdots + \alpha_{n-2}) + \alpha_{n-1} + \alpha_n = \omega_2$ .
- With support of type  $E_6$ :  $\alpha_1 + 2\alpha_2 + 2\alpha_3 + 3\alpha_4 + 2\alpha_5 + \alpha_6 = \omega_2$ .
- With support of type  $E_7$ :  $2\alpha_1 + 2\alpha_2 + 3\alpha_3 + 4\alpha_4 + 3\alpha_5 + 2\alpha_6 + \alpha_7 = \omega_1$ .
- With support of type  $E_8$ :  $2\alpha_1 + 3\alpha_2 + 4\alpha_3 + 6\alpha_4 + 5\alpha_5 + 4\alpha_6 + 3\alpha_7 + 2\alpha_8 = \omega_8$ .

Therefore, we are left with all spherically closed spherical roots.

- With support of type  $A_n$ ,  $n \geq 1$ :  $\alpha_1 + \cdots + \alpha_n$ .
- With support of type  $B_n$ ,  $n \geq 2$ :  $\alpha_1 + \cdots + \alpha_n$ .
- With support of type  $C_n$ ,  $n \geq 3$ :  $\alpha_1 + 2(\alpha_2 + \cdots + \alpha_{n-1}) + \alpha_n$ .
- With support of type  $F_4$ :  $\alpha_1 + 2\alpha_2 + 3\alpha_3 + 2\alpha_4$ .

If the support of  $\gamma$  is of type  $G_2$  the only positive root satisfying Lemma 3.6 is  $\alpha_1 + \alpha_2$ , which is a spherically closed spherical root. ■

Let us now consider the case where  $\gamma$  is not a root. In contrast to the root case, here we notice the following general fact.

**Proposition 3.9.** Let  $\alpha$  be a simple root and let  $\beta$  be a non-simple positive root such that  $\alpha + \beta$  is not a root. Then there exists no simple root  $\alpha' \neq \alpha$  such that  $(\alpha + \beta) - \alpha'$  is a root. □

**Proof.** Assume that there exists a simple root  $\alpha' \neq \alpha$  such that  $\alpha + \beta - \alpha'$  is a root. Since  $\beta - \alpha'$  is nonzero, it is a root. This follows from the fact that  $\alpha + \beta$  is not a root, whence  $\langle \alpha^\vee, \beta \rangle \geq 0$ , and so  $\langle \alpha^\vee, \alpha + \beta - \alpha' \rangle > 0$ . Finally, to deduce that  $\alpha + \beta$  is a root (i.e., a contradiction), one can use for example a saturation argument (see [14, Lemma 13.4.B]) as follows.

Restrict the adjoint representation to the Levi subalgebra associated with  $\alpha$  and  $\alpha'$ . Since  $\beta - \alpha'$  is a root, both  $\beta$  and  $\alpha + \beta - \alpha'$  occur as weights in the same irreducible summand, say of highest weight  $\lambda$ . From  $\langle \alpha^\vee, \beta \rangle \geq 0$ , we get that  $\langle \alpha^\vee, \alpha + \beta \rangle > 0$ , and since  $\alpha + \beta$  is not a root,  $\langle (\alpha')^\vee, \alpha + \beta - \alpha' \rangle \geq 0$ , and so  $\langle (\alpha')^\vee, \alpha + \beta \rangle > 0$ . Consequently,  $\alpha + \beta$  is dominant with respect to  $\alpha$  and  $\alpha'$ . Moreover,  $\lambda - \alpha - \beta$  is a sum of simple roots, because  $\lambda - \beta$  and  $\lambda - (\alpha + \beta - \alpha')$  both belong to  $\text{span}_{\mathbb{N}}\{\alpha, \alpha'\}$ . This implies that  $\alpha + \beta$  is a root. ■

Let  $\gamma$  be a  $T_{\text{ad}}$ -weight in  $(V/\mathfrak{g} \cdot x_0)^{G_{x_0}}$  which is not a root. Until Proposition 3.13, we assume that  $\gamma$  is not the sum of two orthogonal simple roots, so that we can speak of the unique simple root  $\alpha$  such that  $\gamma - \alpha$  is a root.

**Lemma 3.10.** Let  $\alpha$  be the simple root such that  $\gamma - \alpha$  is a root. If  $\gamma \neq 2\alpha$ , then  $\alpha$  is orthogonal to  $\gamma - \alpha$ .  $\square$

**Proof.** We can choose a basis of  $\mathfrak{g}$

$$\{X_\beta : \beta \text{ root}\} \cup \{\alpha^\vee : \alpha \text{ simple root}\}$$

such that  $[X_\beta, X_{-\beta}] = \beta^\vee$  for all positive roots  $\beta$ , and then for all roots  $\beta_1, \beta_2$  denote by  $c_{\beta_1, \beta_2}$  the scalar such that  $[X_{\beta_1}, X_{\beta_2}] = c_{\beta_1, \beta_2} X_{\beta_1 + \beta_2}$ . For example, a Chevalley basis does the job (see [14, Theorem 25.2]).

Since  $X_\alpha v \neq 0$ , we can assume that  $X_\alpha v = X_{-\gamma+\alpha} x_0$ . Assume also, to obtain a contradiction, that  $\langle \alpha^\vee, \gamma - \alpha \rangle > 0$ . Hence  $\gamma - 2\alpha$  is a positive root. Since  $\gamma$  is not a root, we have that  $X_{\gamma-\alpha} X_\alpha v = X_\alpha X_{\gamma-\alpha} v$ . From the following identities

$$\begin{aligned} X_{\gamma-\alpha} X_\alpha v &= \frac{1}{c_{\gamma-2\alpha, \alpha}} [X_{\gamma-2\alpha}, X_\alpha] X_\alpha v = \frac{1}{c_{\gamma-2\alpha, \alpha}} [X_{\gamma-2\alpha}, X_\alpha] X_{-\gamma+\alpha} x_0 \\ &= \frac{1}{c_{\gamma-2\alpha, \alpha}} (X_{\gamma-2\alpha} [X_\alpha, X_{-\gamma+\alpha}] - X_\alpha [X_{\gamma-2\alpha}, X_{-\gamma+\alpha}]) x_0 \\ &= \frac{c_{\alpha, -\gamma+\alpha}}{c_{\gamma-2\alpha, \alpha}} [X_{\gamma-2\alpha}, X_{-\gamma+2\alpha}] x_0 - \frac{c_{\gamma-2\alpha, -\gamma+\alpha}}{c_{\gamma-2\alpha, \alpha}} [X_\alpha, X_{-\alpha}] x_0 \\ X_\alpha X_{\gamma-\alpha} v &= \frac{1}{c_{\gamma-2\alpha, \alpha}} X_\alpha [X_{\gamma-2\alpha}, X_\alpha] v = \frac{1}{c_{\gamma-2\alpha, \alpha}} X_\alpha [X_{\gamma-2\alpha}, X_{-\gamma+\alpha}] x_0 \\ &= \frac{c_{\gamma-2\alpha, -\gamma+\alpha}}{c_{\gamma-2\alpha, \alpha}} [X_\alpha, X_{-\alpha}] x_0 \end{aligned}$$

it then follows that

$$\frac{c_{\alpha, -\gamma+\alpha}}{c_{\gamma-2\alpha, \alpha}} (\gamma - 2\alpha)^\vee - 2 \frac{c_{\gamma-2\alpha, -\gamma+\alpha}}{c_{\gamma-2\alpha, \alpha}} \alpha^\vee \quad (3.11)$$

takes value zero on all  $\lambda \in F$ . Since  $\gamma \in \mathbb{Z}F$ , the expression (3.11) takes value zero on  $\gamma$ , too.

Actually, the linear combination (3.11) of coroots does not depend on the choice of the basis of  $\mathfrak{g}$ . Indeed,

$$\begin{aligned} c_{\gamma-2\alpha, \alpha} (\gamma - \alpha)^\vee &= [[X_{\gamma-2\alpha}, X_\alpha], X_{-\gamma+\alpha}] \\ &= [X_{\gamma-2\alpha}, [X_\alpha, X_{-\gamma+\alpha}]] - [X_\alpha, [X_{\gamma-2\alpha}, X_{-\gamma+\alpha}]] \\ &= c_{\alpha, -\gamma+\alpha} (\gamma - 2\alpha)^\vee - c_{\gamma-2\alpha, -\gamma+\alpha} \alpha^\vee \end{aligned}$$

and

$$(\gamma - \alpha)^\vee = \frac{\|\gamma - 2\alpha\|^2}{\|\gamma - \alpha\|^2} (\gamma - 2\alpha)^\vee + \frac{\|\alpha\|^2}{\|\gamma - \alpha\|^2} \alpha^\vee.$$

Therefore, since  $(\gamma - 2\alpha)^\vee$  and  $\alpha^\vee$  are linearly independent, (3.11) becomes

$$\frac{\|\gamma - 2\alpha\|^2}{\|\gamma - \alpha\|^2} (\gamma - 2\alpha)^\vee + 2 \frac{\|\alpha\|^2}{\|\gamma - \alpha\|^2} \alpha^\vee \quad (3.12)$$

which is proportional to  $\gamma^\vee$ . Since  $\|\gamma\|^2$  is not zero, the expression in (3.11) cannot take value zero on  $\gamma$ , and we have obtained the desired contradiction. ■

**Lemma 3.11** ([4, Lemma 3.6]). Let  $\alpha$  be the simple root such that  $\gamma - \alpha$  is a positive root. If  $\gamma - \alpha = \beta_1 + \beta_2$  with  $\beta_1$  and  $\beta_2$  positive roots, then  $\alpha + \beta_1$  or  $\alpha + \beta_2$  is a root. □

**Proof.** Since  $X_\alpha v \neq 0$ , we can assume that  $X_\alpha v = X_{-\gamma+\alpha} x_0$ . Next, we claim that if  $\alpha + \beta_1 \notin R^+$ , then  $X_{\beta_2} v = 0$ . Indeed, if  $X_{\beta_2} v$  were nonzero, then it would be a  $T_{\text{ad}}$ -weight vector of weight  $\alpha + \beta_1$ . Since  $X_{\beta_2} v \in \mathfrak{g} \cdot x_0$  it would follow by Proposition 3.4(a) that  $\alpha + \beta_1 \in R^+$ . This proves the claim. Similarly, if  $\alpha + \beta_2 \notin R^+$ , then  $X_{\beta_1} v = 0$ . Therefore, if neither  $\alpha + \beta_1$  nor  $\alpha + \beta_2$  is a root, then  $X_{\gamma-\alpha} v = 0$ . Since  $\gamma \notin R^+$ , this implies

$$0 = X_\alpha X_{\gamma-\alpha} v = X_{\gamma-\alpha} X_\alpha v = X_{\gamma-\alpha} X_{-\gamma+\alpha} x_0$$

which means  $X_{-\gamma+\alpha} x_0 = 0$ , a contradiction. ■

**Lemma 3.12.** Let  $\alpha$  be the simple root such that  $\gamma - \alpha$  is a root. Let  $\delta$  be a simple root and  $k$  an integer  $2 \leq k \leq 4$  such that  $\gamma - j\alpha - \delta$  is a root for  $1 \leq j \leq k$ ,  $j\alpha + \delta$  is a root for  $1 \leq j < k$ , but  $k\alpha + \delta$  is not a root. Then  $\gamma - k\alpha$  is orthogonal to every  $\lambda \in F$ ; and in particular

$$\|\gamma - \alpha\|^2 = (k-1) \|\alpha\|^2. \quad (3.13)$$

□

**Proof.** We can choose a basis as in the proof of Lemma 3.10 and, since  $X_\alpha v \neq 0$ , we can assume that  $X_\alpha v = X_{-\gamma+\alpha} x_0$ .

First, let us assume also, for simplicity, that  $k=2$ . Then one has the following identities:

$$\begin{aligned}
X_{\gamma-\alpha} X_\alpha v &= \frac{1}{c_{\gamma-\alpha-\delta, \delta}} [X_{\gamma-\alpha-\delta}, X_\delta] X_{-\gamma+\alpha} x_0 \\
&= \frac{1}{c_{\gamma-\alpha-\delta, \delta}} (X_{\gamma-\alpha-\delta} [X_\delta, X_{-\gamma+\alpha}] - X_\delta [X_{\gamma-\alpha-\delta}, X_{-\gamma+\alpha}]) x_0 \\
&= \frac{c_{\delta, -\gamma+\alpha}}{c_{\gamma-\alpha-\delta, \delta}} [X_{\gamma-\alpha-\delta}, X_{-\gamma+\alpha+\delta}] x_0 - \frac{c_{\gamma-\alpha-\delta, -\gamma+\alpha}}{c_{\gamma-\alpha-\delta, \delta}} [X_\delta, X_{-\delta}] x_0 \\
X_\alpha X_{\gamma-\alpha} v &= \frac{1}{c_{\gamma-\alpha-\delta, \delta}} X_\alpha [X_{\gamma-\alpha-\delta}, X_\delta] v = -\frac{1}{c_{\gamma-\alpha-\delta, \delta}} X_\alpha X_\delta X_{\gamma-\alpha-\delta} v \\
&= -\frac{1}{c_{\gamma-\alpha-\delta, \delta} c_{\gamma-2\alpha-\delta, \alpha}} X_\alpha X_\delta [X_{\gamma-2\alpha-\delta}, X_\alpha] v \\
&= -\frac{1}{c_{\gamma-\alpha-\delta, \delta} c_{\gamma-2\alpha-\delta, \alpha}} X_\alpha X_\delta [X_{\gamma-2\alpha-\delta}, X_{-\gamma+\alpha}] x_0 \\
&= -\frac{c_{\gamma-2\alpha-\delta, -\gamma+\alpha}}{c_{\gamma-\alpha-\delta, \delta} c_{\gamma-2\alpha-\delta, \alpha}} X_\alpha [X_\delta, X_{-\alpha-\delta}] x_0 \\
&= -\frac{c_{\gamma-2\alpha-\delta, -\gamma+\alpha} c_{\delta, -\alpha-\delta}}{c_{\gamma-\alpha-\delta, \delta} c_{\gamma-2\alpha-\delta, \alpha}} [X_\alpha, X_{-\alpha}] x_0
\end{aligned}$$

We thus find a linear combination of co-roots

$$\frac{c_{\delta, -\gamma+\alpha}}{c_{\gamma-\alpha-\delta, \delta}} (\gamma - \alpha - \delta)^\vee - \frac{c_{\gamma-\alpha-\delta, -\gamma+\alpha}}{c_{\gamma-\alpha-\delta, \delta}} \delta^\vee + \frac{c_{\gamma-2\alpha-\delta, -\gamma+\alpha} c_{\delta, -\alpha-\delta}}{c_{\gamma-\alpha-\delta, \delta} c_{\gamma-2\alpha-\delta, \alpha}} \alpha^\vee \quad (3.14)$$

which must take value zero on all  $\lambda \in F$ . We now compute the coefficients in the above linear combination of coroots, showing they do not depend on the choice of the basis of  $\mathfrak{g}$ . Indeed,

$$\begin{aligned}
c_{\gamma-\alpha-\delta, \delta} (\gamma - \alpha)^\vee &= [[X_{\gamma-\alpha-\delta}, X_\delta], X_{-\gamma+\alpha}] \\
&= [X_{\gamma-\alpha-\delta}, [X_\delta, X_{-\gamma+\alpha}]] - [X_\delta, [X_{\gamma-\alpha-\delta}, X_{-\gamma+\alpha}]] \\
&= c_{\delta, -\gamma+\alpha} (\gamma - \alpha - \delta)^\vee - c_{\gamma-\alpha-\delta, -\gamma+\alpha} \delta^\vee
\end{aligned}$$

and, since

$$\begin{aligned}
&c_{\gamma-\alpha-\delta, \delta} c_{\gamma-2\alpha-\delta, \alpha} (\gamma - \alpha)^\vee + c_{\gamma-\alpha-\delta, -\gamma+\alpha} c_{\gamma-2\alpha-\delta, \alpha} \delta^\vee \\
&= [[[X_{\gamma-2\alpha-\delta}, X_\alpha], X_\delta], X_{-\gamma+\alpha}] - [[[X_{\gamma-2\alpha-\delta}, X_\alpha], X_{-\gamma+\alpha}], X_\delta]
\end{aligned}$$

$$\begin{aligned}
&= [[X_{\gamma-2\alpha-\delta}, X_\alpha], [X_\delta, X_{-\gamma+\alpha}]] \\
&= [[X_{\gamma-2\alpha-\delta}, [X_\delta, X_{-\gamma+\alpha}], X_\alpha] - [X_{\gamma-2\alpha-\delta}, [[X_\delta, X_{-\gamma+\alpha}], X_\alpha]] \\
&= [[X_\delta, [X_{\gamma-2\alpha-\delta}, X_{-\gamma+\alpha}], X_\alpha] - [X_{\gamma-2\alpha-\delta}, [[X_\delta, X_{-\gamma+\alpha}], X_\alpha]] \\
&= -C_{\delta, -\alpha-\delta} C_{\gamma-2\alpha-\delta, -\gamma+\alpha} \alpha^\vee - C_{-\gamma+\alpha+\delta, \alpha} C_{\delta, -\gamma+\alpha} (\gamma - 2\alpha - \delta)^\vee,
\end{aligned}$$

also

$$C_{-\gamma+\alpha+\delta, \alpha} C_{\delta, -\gamma+\alpha} (\gamma - 2\alpha - \delta)^\vee = -C_{\gamma-2\alpha-\delta, \alpha} C_{\delta, -\gamma+\alpha} (\gamma - \alpha - \delta)^\vee - C_{\delta, -\alpha-\delta} C_{\gamma-2\alpha-\delta, -\gamma+\alpha} \alpha^\vee.$$

On the other hand,

$$(\gamma - \alpha)^\vee = \frac{\|\gamma - \alpha - \delta\|^2}{\|\gamma - \alpha\|^2} (\gamma - \alpha - \delta)^\vee + \frac{\|\delta\|^2}{\|\gamma - \alpha\|^2} \delta^\vee$$

and

$$(\gamma - 2\alpha - \delta)^\vee = \frac{\|\gamma - \alpha - \delta\|^2}{\|\gamma - 2\alpha - \delta\|^2} (\gamma - \alpha - \delta)^\vee - \frac{\|\alpha\|^2}{\|\gamma - 2\alpha - \delta\|^2} \alpha^\vee.$$

Therefore, since  $(\gamma - \alpha - \delta)^\vee$  is neither proportional to  $\delta^\vee$  nor to  $\alpha^\vee$ , (3.14) becomes

$$\frac{\|\gamma - \alpha - \delta\|^2}{\|\gamma - \alpha\|^2} (\gamma - \alpha - \delta)^\vee + \frac{\|\delta\|^2}{\|\gamma - \alpha\|^2} \delta^\vee - \frac{\|\alpha\|^2}{\|\gamma - \alpha\|^2} \alpha^\vee \quad (3.15)$$

which is proportional to  $(\gamma - 2\alpha)^\vee$ .

For  $k > 2$ , the proof is similar. If  $k = 3$ , the analog of (3.14) is

$$\begin{aligned}
&\frac{C_{\delta, -\gamma+\alpha}}{C_{\gamma-\alpha-\delta, \delta}} (\gamma - \alpha - \delta)^\vee - \frac{C_{\gamma-\alpha-\delta, -\gamma+\alpha}}{C_{\gamma-\alpha-\delta, \delta}} \delta^\vee + \frac{C_{\gamma-2\alpha-\delta, -\gamma+\alpha} C_{\delta, -\alpha-\delta}}{C_{\gamma-\alpha-\delta, \delta} C_{\gamma-2\alpha-\delta, \alpha}} \alpha^\vee + \\
&- \frac{C_{\gamma-3\alpha-\delta, -\gamma+\alpha} C_{\delta, -\alpha-\delta} C_{\alpha, -2\alpha-\delta}}{C_{\gamma-\alpha-\delta, \delta} C_{\gamma-2\alpha-\delta, \alpha} C_{\gamma-3\alpha-\delta, \alpha}} \alpha^\vee
\end{aligned}$$

which is proportional to  $(\gamma - 3\alpha)^\vee$ . If  $k = 4$ , we get

$$\begin{aligned}
&\frac{C_{\delta, -\gamma+\alpha}}{C_{\gamma-\alpha-\delta, \delta}} (\gamma - \alpha - \delta)^\vee - \frac{C_{\gamma-\alpha-\delta, -\gamma+\alpha}}{C_{\gamma-\alpha-\delta, \delta}} \delta^\vee + \frac{C_{\gamma-2\alpha-\delta, -\gamma+\alpha} C_{\delta, -\alpha-\delta}}{C_{\gamma-\alpha-\delta, \delta} C_{\gamma-2\alpha-\delta, \alpha}} \alpha^\vee \\
&- \frac{C_{\gamma-3\alpha-\delta, -\gamma+\alpha} C_{\delta, -\alpha-\delta} C_{\alpha, -2\alpha-\delta}}{C_{\gamma-\alpha-\delta, \delta} C_{\gamma-2\alpha-\delta, \alpha} C_{\gamma-3\alpha-\delta, \alpha}} \alpha^\vee + \frac{C_{\gamma-4\alpha-\delta, -\gamma+\alpha} C_{\delta, -\alpha-\delta} C_{\alpha, -2\alpha-\delta} C_{\alpha, -3\alpha-\delta}}{C_{\gamma-\alpha-\delta, \delta} C_{\gamma-2\alpha-\delta, \alpha} C_{\gamma-3\alpha-\delta, \alpha} C_{\gamma-4\alpha-\delta, \alpha}} \alpha^\vee
\end{aligned}$$

which is proportional to  $(\gamma - 4\alpha)^\vee$ .

Finally, since  $\gamma - k\alpha$  is orthogonal to every  $\lambda \in F$ , we have  $(\gamma - k\alpha, \gamma) = 0$ , which yields (3.13). Indeed, the assumption implies that  $\gamma \neq 2\alpha$ , hence  $(\alpha, \gamma - \alpha) = 0$  by Lemma 3.10, and

$$0 = (\gamma - k\alpha, \gamma) = \|\gamma - \alpha\|^2 - (k-1) \|\alpha\|^2. \quad \blacksquare$$

**Proposition 3.13.** Suppose  $\gamma$  is not a root and let  $\alpha$  be a simple root such that  $\gamma - \alpha$  is a root. Then  $\gamma - \alpha$  is locally the highest root, that is, the highest root in the root subsystem generated by the simple roots of its support.  $\square$

**Proof.** (I) First we want to prove that  $\gamma - \alpha$  is locally dominant. We can assume that  $\gamma - \alpha$  is not simple. Hence, by Lemma 3.10,  $\alpha$  is orthogonal to  $\gamma - \alpha$ .

There exists a simple root  $\delta$  (different from  $\alpha$ ) such that  $\gamma - \alpha - \delta$  is a root. By Proposition 3.9 and Lemma 3.11  $\alpha + \delta$  is a root.

Since  $\alpha + \delta$  is a root,  $\langle \alpha^\vee, \delta \rangle < 0$ . Therefore,  $\langle \alpha^\vee, \gamma - \alpha - \delta \rangle > 0$  hence  $\gamma - 2\alpha - \delta$  is a root. If moreover  $2\alpha + \delta$  is a root, then by  $\mathfrak{sl}(2)$ -theory,  $\langle \alpha^\vee, \alpha + \delta \rangle \leq 0$  and so  $\langle \alpha^\vee, \gamma - 2\alpha - \delta \rangle \geq 0$ , whence  $\gamma - 3\alpha - \delta$  is a root. If  $3\alpha + \delta$  is also a root, then  $\alpha$  and  $\delta$  span a root system of type  $G_2$ . Consequently,  $\langle \alpha^\vee, \gamma - 3\alpha - \delta \rangle = -1$  and  $\gamma - 4\alpha - \delta$  is a root.

Therefore, we can apply Lemma 3.12 and obtain that, for some  $k \geq 1$ ,  $\gamma - k\alpha$  is orthogonal to every  $\lambda \in F$ . This implies that  $\langle (\alpha')^\vee, \gamma \rangle = 0$  for all  $\alpha' \in \text{supp}(\gamma) \setminus \{\alpha\}$ , whence  $\langle (\alpha')^\vee, \gamma - \alpha \rangle \geq 0$  for all such  $\alpha'$ . Since  $\alpha$  is orthogonal to  $\gamma - \alpha$ , it follows that  $\gamma - \alpha$  is locally dominant.

(II) To obtain a contradiction, we now assume that  $\gamma - \alpha$  is not locally the highest root, that is, a locally short dominant root with support of non-simply laced type:

- in type  $B_n$ ,  $n \geq 2$ , the short dominant root is  $\alpha_1 + \cdots + \alpha_n = \omega_1$ ;
- in type  $C_n$ ,  $n \geq 3$ , the short dominant root is  $\alpha_1 + 2(\alpha_2 + \cdots + \alpha_{n-1}) + \alpha_n = \omega_2$ ;
- in type  $F_4$  the short dominant root is  $\alpha_1 + 2\alpha_2 + 3\alpha_3 + 2\alpha_4 = \omega_4$ ;
- in type  $G_2$  the short dominant root is  $2\alpha_1 + \alpha_2 = \omega_1$ .

By equation (3.13),  $\alpha$  is also short and  $k=2$ , in particular the support of  $\gamma$  is not of type  $G_2$ . Moreover, by Lemma 3.10,  $\alpha$  is orthogonal to  $\gamma - \alpha$ . In type  $B_n$  and in type  $F_4$  this implies that  $\gamma$  is a root.

We are left with the case where the support of  $\gamma - \alpha$  is of type  $C_n$ . Since  $\alpha$  is short,  $\alpha$  is orthogonal to  $\gamma - \alpha$ ,  $\gamma$  is not a root, and moreover there exists a simple root  $\delta \neq \alpha$  satisfying the hypothesis of Lemma 3.12 for  $k=2$ , we have that  $n > 3$ ,  $\delta = \alpha_2$  and  $\alpha = \alpha_3$ . This contradicts Lemma 3.11, because  $\alpha_1$  and  $\gamma - \alpha - \alpha_1$  are roots, but neither  $\alpha_1 + \alpha$  nor  $\gamma - \alpha_1$  is a root.  $\blacksquare$

The following is Theorem 3.3 for the case that  $\gamma$  is not a root.

**Corollary 3.14.** Let  $\gamma$  be a  $T_{\text{ad}}$ -weight in  $(V/\mathfrak{g} \cdot x_0)^{G_{x_0}}$ . If  $\gamma$  is not a root, then  $\gamma$  is a spherically closed spherical root of  $G$ .  $\square$

**Proof.** We list all the locally highest roots  $\beta$  and deduce which are the only possible non-roots  $\gamma$  (obtained by adding to  $\beta$  a simple root) satisfying Lemmas 3.10, 3.11, and 3.12.

In general,  $\langle \alpha^\vee, \beta \rangle$  must be  $\geq 0$  otherwise  $\alpha + \beta \in R^+$ . If  $\alpha$  is not in the support of  $\beta$  it must be orthogonal to  $\beta$ , and in this case, by Lemma 3.11,  $\beta$  must necessarily be simple.

Let us start with  $\beta$  simple, that is, with support of type  $A_1$ :  $\beta = \alpha_1 = 2\omega_1$  gives only

$$2\alpha_1$$

or

$$\alpha_1 + \alpha'_1.$$

Let us now pass to  $\beta$  not simple and recall that  $\alpha$  must necessarily belong to the support of  $\beta$ , moreover by Lemma 3.10  $\langle \alpha^\vee, \beta \rangle = 0$  and by Lemma 3.12, for all  $\alpha' \in S \setminus \{\alpha\}$ ,  $\langle (\alpha')^\vee, \alpha + \beta \rangle = 0$ .

With support of type  $A_n$ ,  $n \geq 2$ :  $\beta = \alpha_1 + \cdots + \alpha_n = \omega_1 + \omega_n$  gives only, for  $n = 3$ ,

$$\alpha_1 + 2\alpha_2 + \alpha_3.$$

With support of type  $B_n$ ,  $n \geq 2$ :  $\beta = \alpha_1 + 2(\alpha_2 + \cdots + \alpha_n) = \omega_2$  if  $n \geq 3$  (it equals  $2\omega_2$  if  $n = 2$ ) gives only

$$2(\alpha_1 + \cdots + \alpha_n)$$

or, for  $n = 3$ ,

$$\alpha_1 + 2\alpha_2 + 3\alpha_3.$$

With support of type  $D_n$ ,  $n \geq 4$ :  $\beta = \alpha_1 + 2(\alpha_2 + \cdots + \alpha_{n-2}) + \alpha_{n-1} + \alpha_n = \omega_2$  gives only

$$2(\alpha_1 + \cdots + \alpha_{n-2}) + \alpha_{n-1} + \alpha_n$$

or, for  $n = 4$ ,

$$\alpha_1 + 2\alpha_2 + 2\alpha_3 + \alpha_4$$

and

$$\alpha_1 + 2\alpha_2 + \alpha_3 + 2\alpha_4$$

which are equal to  $2\alpha_1 + 2\alpha_2 + \alpha_3 + \alpha_4$  up to an automorphism of the Dynkin diagram.

With support of type  $G_2$ :  $\beta = 3\alpha_1 + 2\alpha_2 = \omega_2$  gives only

$$4\alpha_1 + 2\alpha_2.$$

The remaining cases give no other possibilities:

- with support of type  $C_n$ ,  $n \geq 3$ ,  $\beta = 2(\alpha_1 + \cdots + \alpha_{n-1}) + \alpha_n = 2\omega_1$ ;
- with support of type  $E_6$ ,  $\beta = \alpha_1 + 2\alpha_2 + 2\alpha_3 + 3\alpha_4 + 2\alpha_5 + \alpha_6 = \omega_2$ ;
- with support of type  $E_7$ ,  $\beta = 2\alpha_1 + 2\alpha_2 + 3\alpha_3 + 4\alpha_4 + 3\alpha_5 + 2\alpha_6 + \alpha_7 = \omega_1$ ;
- with support of type  $E_8$ ,  $\beta = 2\alpha_1 + 3\alpha_2 + 4\alpha_3 + 6\alpha_4 + 5\alpha_5 + 4\alpha_6 + 3\alpha_7 + 2\alpha_8 = \omega_8$ ;
- with support of type  $F_4$ ,  $\beta = 2\alpha_1 + 3\alpha_2 + 4\alpha_3 + 2\alpha_4 = \omega_1$ . ■

### 3.3 Further properties of $T_{\text{ad}}$ -weights in $(V/\mathfrak{g} \cdot x_0)^{G_{x_0}}$

After Theorem 3.3 the only possible  $T_{\text{ad}}$ -weights in  $(V/\mathfrak{g} \cdot x_0)^{G_{x_0}}$  are spherically closed spherical roots of  $G$ , but each of them occur only under special conditions which we are going to describe.

The first statement is indeed a refinement of Theorem 3.3. Recall the notion of compatibility with  $S^p$  (see axiom (S) of Definition 2.5 and Remark 2.6.1).

**Theorem 3.15.** If  $\gamma$  is a  $T_{\text{ad}}$ -weight in  $(V/\mathfrak{g} \cdot x_0)^{G_{x_0}}$ , then  $\gamma$  is a spherically closed spherical root of  $G$  compatible with  $S^p(\Gamma)$ . □

**Proof.** If  $\gamma = \alpha_1 + \alpha_2 + \cdots + \alpha_n$  with support of type  $A_n$ , then  $\{\alpha_2, \alpha_3, \dots, \alpha_{n-1}\} \subset S^p(\Gamma)$ . This follows from Part I of the proof of Proposition 3.7.

If  $\gamma = \alpha_1 + 2\alpha_2 + \alpha_3$  with support of type  $A_3$ , then  $\{\alpha_1, \alpha_3\} \subset S^p(\Gamma)$ . This follows by Lemma 3.12 ( $\alpha = \alpha_2$ ,  $\delta = \alpha_1$  and  $k = 2$ ).

If  $\gamma = \alpha_1 + \alpha_2 + \cdots + \alpha_n$  with support of type  $B_n$ , then  $\{\alpha_2, \alpha_3, \dots, \alpha_{n-1}\} \subset S^p(\Gamma)$  and  $\alpha_n \notin S^p(\Gamma)$ . The former follows from Part I of the proof of Proposition 3.7. For the latter, we can assume that  $X_{\alpha_n}v = 0$  and  $X_{\alpha_1}v = X_{-\gamma+\alpha_n}x_0$  nonzero, which implies  $\alpha_n \notin S^p$ .

If  $\gamma = 2(\alpha_1 + \cdots + \alpha_n)$  with support of type  $B_n$ , then  $\{\alpha_2, \dots, \alpha_n\} \subset S^p(\Gamma)$ . This follows by Lemma 3.12 ( $\alpha = \alpha_1$ ,  $\delta = \alpha_2$  and  $k = 2$ ).

If  $\gamma = \alpha_1 + 2\alpha_2 + 3\alpha_3$  with support of type  $B_3$ , then  $\{\alpha_1, \alpha_2\} \subset S^p(\Gamma)$ . This follows by Lemma 3.12 ( $\alpha = \alpha_3$ ,  $\delta = \alpha_2$  and  $k = 3$ ).

If  $\gamma = \alpha_1 + 2(\alpha_2 + \cdots + \alpha_{n-1}) + \alpha_n$  with support of type  $C_n$ , then  $\{\alpha_3, \alpha_4, \dots, \alpha_n\} \subset S^p(\Gamma)$ . This follows from part V of the proof of Proposition 3.7.



If  $\gamma = 2(\alpha_1 + \cdots + \alpha_{n-2}) + \alpha_{n-1} + \alpha_n$  with support of type  $D_n$ , then  $\{\alpha_2, \dots, \alpha_n\} \subset S^p(\Gamma)$ . This follows by Lemma 3.12 ( $\alpha = \alpha_1$ ,  $\delta = \alpha_2$  and  $k = 2$ ).

If  $\gamma = \alpha_1 + 2\alpha_2 + 3\alpha_3 + 2\alpha_4$  with support of type  $F_4$ , then  $\{\alpha_1, \alpha_2, \alpha_3\} \subset S^p(\Gamma)$ . This follows from part V of the proof of Proposition 3.7.

If  $\gamma = 4\alpha_1 + 2\alpha_2$  with support of type  $G_2$ , then  $\alpha_2 \in S^p(\Gamma)$ . This follows by Lemma 3.12 ( $\alpha = \alpha_1$ ,  $\delta = \alpha_2$ , and  $k = 4$ ). ■

**Proposition 3.16.** If  $\gamma$  is not a simple root then the  $T_{\text{ad}}$ -eigenspace  $(V/\mathfrak{g} \cdot x_0)_{(\gamma)}^{G_{x_0}}$  has dimension  $\leq 1$ . □

**Proof.** If  $\gamma$  is a root (not simple), recall that there exist two simple roots, say  $\alpha_1$  and  $\alpha_2$ , such that  $\gamma - \alpha_1$  and  $\gamma - \alpha_2$  is a root, and  $\gamma - \alpha$  is not a root for all  $\alpha \in S \setminus \{\alpha_1, \alpha_2\}$ . In particular, for all  $\alpha \in S \setminus \{\alpha_1, \alpha_2\}$ , we necessarily have  $X_\alpha v = 0$ . By adding to  $v$  a suitable scalar multiple of  $X_{-\gamma} x_0$ , we can assume that also  $X_{\alpha_2} v = 0$ . Moreover, by choosing a suitable scalar multiple, we can assume that  $X_{\alpha_1} v = X_{-\gamma + \alpha_1} x_0$ .

If  $\gamma$  is neither a root nor the sum of two orthogonal simple roots, recall that there exists a simple root  $\alpha_1$  such that  $\gamma - \alpha_1$  is a root, and  $\gamma - \alpha$  is not a root for all  $\alpha \in S \setminus \{\alpha_1\}$ . In particular, for all  $\alpha \in S \setminus \{\alpha_1\}$ , we necessarily have  $X_\alpha v = 0$ . Therefore, by choosing a suitable scalar multiple, we can assume that  $X_{\alpha_1} v = X_{-\gamma + \alpha_1} x_0$ .

In both cases, we claim that under the above assumptions  $v$  is uniquely determined. Indeed, if  $v_1$  and  $v_2$  are two vectors in  $V$  of  $T_{\text{ad}}$ -weight  $\gamma$  fulfilling the above conditions, then  $X_\alpha(v_1 - v_2) = 0$  for all  $\alpha \in S$ , which implies  $v_1 = v_2$ .

We are left with only one case: the spherical root  $\gamma = \alpha + \alpha'$  with support of type  $A_1 \times A_1$ . We can assume  $X_\alpha v = X_{-\alpha'} x_0$ . For all  $i \in \{1, \dots, r\}$ ,  $\dim V(\lambda_i)_{(\gamma)} \leq 1$ , and the condition  $X_\alpha v = X_{-\alpha'} x_0$  uniquely determines every component  $v_i \in V(\lambda_i)$  of  $v$ . ■

#### 4 The Weight Spaces of $T_{X_0} H_\Gamma$

In this section, we prove the following theorem.

**Theorem 4.1.** If  $\Gamma$  is a free monoid of dominant weights, then  $T_{X_0} H_\Gamma$  is a multiplicity-free  $T_{\text{ad}}$ -module of which all the weights belong to  $\Sigma^{sc}(G)$ . Moreover, if  $\gamma \in \Sigma^{sc}(G)$  occurs as a  $T_{\text{ad}}$ -weight in  $T_{X_0} H_\Gamma$ , then  $\gamma$  is  $N$ -adapted to  $\Gamma$ . □

**Proof.** The assertion that all  $T_{\text{ad}}$ -weights of  $T_{X_0} H_\Gamma$  belong to  $\Sigma^{sc}(G)$  follows from the inclusion  $T_{X_0} H_\Gamma \hookrightarrow (V/\mathfrak{g} \cdot x_0)^{G_{x_0}}$  and Theorem 3.3, while the assertion that the weight space  $(T_{X_0} H_\Gamma)_{(\gamma)}$  has dimension at most one follows from Proposition 3.16 if  $\gamma \notin S$ , and

from Proposition 4.6 if  $\gamma \in S$ . The statement that if  $\gamma \in \Sigma^{sc}(G)$  is a  $T_{\text{ad}}$ -weight in  $T_{X_0}H_\Gamma$ , then  $\gamma$  is  $N$ -adapted to  $\Gamma$ , is contained in Proposition 4.6 for  $\gamma \in S$  and is shown in Section 4.3 for  $\gamma \notin S$ . ■

Recall from Proposition 3.1 that  $M_\Gamma$  is  $T_{\text{ad}}$ -equivariantly isomorphic to an open subscheme of  $H_\Gamma$ . Because every  $T_{\text{ad}}$ -weight in  $T_{X_0}M_\Gamma \simeq T_{X_0}H_\Gamma$  is an element of  $\Sigma^{sc}(G)$  (see Theorem 3.3) we obtain the following converse to the second statement in Theorem 4.1.

**Corollary 4.2.** Let  $\Gamma$  be a free monoid of dominant weights and let  $\sigma \in \Sigma^{sc}(G)$ . If  $\sigma$  is  $N$ -adapted to  $\Gamma$ , then  $\sigma$  is a  $T_{\text{ad}}$ -weight in  $T_{X_0}M_\Gamma$ . □

**Proof.** Let  $X$  be an affine spherical  $G$ -variety with  $\Gamma(X) = \Gamma$  and  $\Sigma^N(X) = \{\sigma\}$ , and let  $\mathcal{M}_X$  be its root monoid. Recall that  $\Sigma^N(X)$  is the basis of the saturation of  $\mathcal{M}_X$ . Let  $\{a_1, a_2, \dots, a_k\}$  be a subset of  $\mathbb{N}$  such that  $\{a_1\sigma, a_2\sigma, \dots, a_k\sigma\}$  is the minimal set of generators of  $\mathcal{M}_X$ . By [2, Proposition 2.13], the  $T_{\text{ad}}$ -orbit closure of  $X$ , seen as a closed point of  $M_\Gamma$ , is  $\text{Spec}(\mathbb{k}[-\mathcal{M}_X])$ . A straightforward computation using the basic theory of semi-group rings (see, e.g., [22, Section 7.1]) shows that

$$T_{X_0}(\overline{T_{\text{ad}} \cdot X}) \simeq \mathbb{k}_{a_1\sigma} \oplus \mathbb{k}_{a_2\sigma} \oplus \dots \oplus \mathbb{k}_{a_k\sigma}$$

as  $T_{\text{ad}}$ -modules, where we used  $\mathbb{k}_{a_i\sigma}$  for the one-dimensional  $T_{\text{ad}}$ -representation of weight  $a_i\sigma$ . We claim that one of the  $a_i$  is equal to 1 (and consequently that  $\mathcal{M}_X$  is generated by  $\{\sigma\}$ ). We show this by contradiction. Suppose that all of the  $a_i$  are at least 2. Then  $k \geq 2$ , since otherwise  $\sigma$  would not be in  $\mathbb{Z}\mathcal{M}_X$ . Since  $T_{X_0}(\overline{T_{\text{ad}} \cdot X}) \subset T_{X_0}M_\Gamma \subset (V/\mathfrak{g} \cdot x_0)^{G_{x_0}}$ , it then follows from Theorem 3.3 that  $\{\sigma, a_1\sigma, a_2\sigma\} \subset \Sigma^{sc}(G)$ . By the classification of spherically closed spherical roots (cf. Proposition 2.4) this is impossible: only the double or half of a spherically closed spherical root can be a spherically closed spherical root, and never both. ■

As before,  $\Gamma$  will be a free monoid of dominant weights with basis  $F = \{\lambda_1, \lambda_2, \dots, \lambda_r\}$ . If  $\lambda \in F$ , then we will write  $\lambda^\#$  for the corresponding element of the dual basis of  $(\mathbb{Z}\Gamma)^*$ ; in other words, for all  $\mu \in F \setminus \{\lambda\}$  we have  $\langle \lambda^\#, \mu \rangle = 0$ , whereas  $\langle \lambda^\#, \lambda \rangle = 1$ . Recall that  $E(\Gamma)$  is defined in (2.3). Because  $\Gamma$  is free, we have that  $E(\Gamma)$  is the dual basis to  $F$ :

$$E(\Gamma) = \{\lambda^\# \in (\mathbb{Z}\Gamma)^* : \lambda \in F\}.$$

For  $\lambda \in F$  we put

$$Z_\lambda := X_0 - v_\lambda.$$

#### 4.1 The extension criterion

We recall from [24] a criterion which allows to decide whether a  $T_{\text{ad}}$ -eigenvector  $[v] \in (V/\mathfrak{g} \cdot x_0)^{G_{x_0}} \simeq H^0(G \cdot X_0, \mathcal{N}_{X_0|V})^G$  belongs to the subspace  $T_{X_0}H_\Gamma \simeq H^0(X_0, \mathcal{N}_{X_0|V})^G$ .

We denote by  $X_0^{\leq 1} \subset X_0$  the union of  $G \cdot x_0$  with all  $G$ -orbits of  $X_0$  that have codimension 1. By [10, Lemma 1.14]  $X_0^{\leq 1}$  is an open subset of  $X_0$ . The following proposition is a special case of [11, Lemma 3.9]. Together with Theorem 4.5 it gives the aforementioned criterion.

**Proposition 4.3.** A section  $s \in H^0(G \cdot X_0, \mathcal{N}_{X_0|V})$  extends to  $X_0$  if and only if it extends to  $X_0^{\leq 1}$ .  $\square$

We recall that the orbit structure of  $X_0$  is well understood [29, Theorem 8]. It is easy to describe the orbits of codimension 1 (see, e.g., [23, Proposition 3.1] for details).

**Proposition 4.4.** The  $G$ -orbits of codimension 1 in  $X_0$  are exactly the orbits  $G \cdot z_\lambda$  where  $\lambda$  is an element of  $F$  that satisfies the following property:

for every  $\alpha \in S$  such that  $\langle \alpha^\vee, \lambda \rangle \neq 0$  there exists  $\mu \in F \setminus \{\lambda\}$  such that  $\langle \alpha^\vee, \mu \rangle \neq 0$ .  $\square$

**Theorem 4.5** ([24, Theorem 2.5]). Let  $v \in V$  be a  $T_{\text{ad}}$ -eigenvector of weight  $\gamma$  such that  $0 \neq [v] \in (V/\mathfrak{g} \cdot x_0)^{G_{x_0}}$ . Let  $\lambda \in F$ . Recall that  $z_\lambda = x_0 - v_\lambda$ . Assume that  $z_\lambda \in X_0^{\leq 1}$  and put  $Z := G \cdot x_0 \cup G \cdot z_\lambda$ . Put  $a := \langle \lambda^\#, \gamma \rangle$ . Denote by  $s \in H^0(G \cdot x_0, \mathcal{N}_{X_0|V})^G$  the  $G$ -equivariant section such that  $s(x_0) = [v]$ .

- (A) If  $a \leq 0$ , then  $s$  extends to an element of  $H^0(Z, \mathcal{N}_{X_0|V})^G$ .
- (B) If  $a > 1$ , then  $s$  does not extend to an element of  $H^0(Z, \mathcal{N}_{X_0|V})^G$ .
- (C) If  $a = 1$ , then the following are equivalent:

- (i)  $s$  extends to an element of  $H^0(Z, \mathcal{N}_{X_0|V})^G$ ;
- (ii) there exist  $\hat{v} \in V(\lambda)$  such that  $[v] = [\hat{v}]$  as elements of  $V/\mathfrak{g} \cdot x_0$ .  $\square$

#### 4.2 The spherical root $\gamma = \alpha \in S$

In this section, we discuss the  $T_{\text{ad}}$ -weight space  $(T_{X_0}H_\Gamma)_{(\alpha)}$ , where  $\alpha$  is a simple root. Specifically, we will prove the following proposition, which is a special case of Theorem 4.1.

**Proposition 4.6.** If  $\alpha$  is a simple root, then  $\dim(T_{X_0}H_\Gamma)_{(\alpha)} \leq 1$ . Moreover, if  $\dim(T_{X_0}H_\Gamma)_{(\alpha)} = 1$ , then  $\alpha$  is  $N$ -adapted to  $\Gamma$ .  $\square$

The proof of Proposition 4.6 will be given on p. 37. We first need a few lemmas and introduce notation we will use for the remainder of this section. Put  $F(\alpha) := \{\lambda \in F : \langle \alpha^\vee, \lambda \rangle \neq 0\}$ . We order the elements of  $F$  such that for  $F(\alpha) = \{\lambda_1, \lambda_2, \dots, \lambda_p\}$  for some  $p \leq r$ . Then  $F \setminus F(\alpha) = \{\lambda_{p+1}, \lambda_{p+2}, \dots, \lambda_r\}$ .

**Lemma 4.7.** For every  $i \in \{1, 2, \dots, p\}$ , put  $v_i = X_{-\alpha}v_{\lambda_i}$ . Then  $v_1 + v_2 + \dots + v_p$  spans the  $T_{\text{ad}}$ -weight space of weight  $\alpha$  in  $\mathfrak{g} \cdot x_0$ . If  $\alpha \in \mathbb{Z}\Gamma$ , then

$$(V/\mathfrak{g} \cdot x_0)_{(\alpha)}^{G_{x_0}} = \langle [v_1], [v_2], \dots, [v_{p-1}] \rangle_{\mathbb{K}}. \quad \square$$

**Proof.** By elementary highest weight theory, the  $T_{\text{ad}}$ -weight space in  $V$  of weight  $\alpha$  is spanned by  $\{v_1, v_2, \dots, v_p\}$ , and the intersection of this weight space with  $\mathfrak{g} \cdot x_0$  is the line spanned by  $X_{-\alpha}x_0 = v_1 + v_2 + \dots + v_p$ . A straightforward application of Proposition 3.4 shows that  $[v_i] \in (V/\mathfrak{g} \cdot x_0)^{G_{x_0}}$  for every  $i \in \{1, 2, \dots, p-1\}$ .  $\blacksquare$

**Lemma 4.8.** Suppose  $\alpha \in \mathbb{Z}\Gamma$  and  $|F(\alpha)| \geq 2$ . Let  $\lambda \in F$ . If  $\langle \lambda^\#, \alpha \rangle > 0$ , then  $G \cdot z_\lambda$  has codimension 1 in  $X_0$ .  $\square$

**Proof.** We will apply Proposition 4.4. Since  $\alpha \in \mathbb{Z}\Gamma$  and  $\Gamma$  is free, there exists a partition  $F = F_1 \cup F_2$  of  $F$  and for every  $\mu \in F$  a unique nonnegative integer  $a_\mu$  such that

$$\alpha = \sum_{\mu \in F_1} a_\mu \mu - \sum_{\mu \in F_2} a_\mu \mu. \quad (4.1)$$

By assumption  $\lambda \in F_1$  and  $a_\lambda = \langle \lambda^\#, \alpha \rangle > 0$ . Let  $\beta \in S \setminus \{\alpha\}$  such that  $\langle \beta^\vee, \lambda \rangle \neq 0$ . Then, since  $F \subset \Lambda^+$  and  $\langle \beta^\vee, \alpha \rangle \leq 0$ , it follows from the expression (4.1) that

$$\sum_{\mu \in F_2} a_\mu \langle \beta^\vee, \mu \rangle \geq a_\lambda \langle \beta^\vee, \lambda \rangle > 0.$$

In particular, there exists  $\mu \in F_2$  such that  $\langle \beta^\vee, \mu \rangle \neq 0$ . Furthermore, whether  $\langle \alpha^\vee, \lambda \rangle$  is zero or not, by the assumption that  $|F(\alpha)| \geq 2$ , there exists  $\mu \in F \setminus \{\lambda\}$  such that  $\langle \alpha^\vee, \mu \rangle \neq 0$ . This finishes the proof.  $\blacksquare$

**Lemma 4.9.** Let  $\alpha$  be a simple root. Recall that  $F(\alpha) = \{\lambda \in F : \langle \alpha^\vee, \lambda \rangle \neq 0\}$  and put  $E(\alpha) := \{\delta \in E(\Gamma) : \langle \delta, \alpha \rangle = 1\}$ . Then  $\dim(\mathrm{T}_{X_0}\mathrm{H}_\Gamma)_{(\alpha)} \leq 1$  and if  $\dim(\mathrm{T}_{X_0}\mathrm{H}_\Gamma)_{(\alpha)} = 1$ , then

- (i)  $\alpha \in \mathbb{Z}\Gamma$ ;
- (ii)  $|F(\alpha)| \geq 2$ ;
- (iii)  $\langle \delta, \alpha \rangle \leq 1$  for all  $\delta \in E(\Gamma)$ ;
- (iv)  $|E(\alpha)| \leq 2$ ;
- (v) If  $|E(\alpha)| = 2$ , then  $E(\alpha) = \{\lambda^\# \in E(\Gamma) : \lambda \in F(\alpha)\}$ .

□

**Proof.** Let us assume that  $\dim(\mathrm{T}_{X_0}\mathrm{H}_\Gamma)_{(\alpha)} \geq 1$ . Let  $[v]$  be a nonzero element of  $(V/\mathfrak{g} \cdot x_0)_{(\alpha)}^{G_{x_0}}$  such that the  $G$ -equivariant section  $s \in H^0(G \cdot x_0, \mathcal{N})^G$  defined by  $s(x_0) = [v]$  extends to  $X_0$ . By Proposition 3.4 and Lemma 4.7, conditions (i) and (ii) hold. Lemma 4.8 and Theorem 4.5 then imply (iii). We now prove (iv). If  $|E(\alpha)| \geq 3$ , then by Theorem 4.5 and Lemma 4.8, there exist at least three elements  $\lambda, \mu$ , and  $\nu$  in  $F(\alpha)$  such that there exist  $y_\lambda \in V(\lambda)$ ,  $y_\mu \in V(\mu)$  and  $y_\nu \in V(\nu)$  for which  $[v] = [y_\lambda] = [y_\mu] = [y_\nu] \in V/\mathfrak{g} \cdot x_0$ . This is impossible by Lemma 4.7 and (iv) is proved. We turn to (v). Suppose  $E(\alpha) = \{\lambda^\#, \mu^\#\}$ . By Lemma 4.8 and Theorem 4.5, there exist  $y_\lambda \in V(\lambda)$  and  $y_\mu \in V(\mu)$  such that  $[v] = [y_\lambda] = [y_\mu] \in V/\mathfrak{g} \cdot x_0$ . Using Lemma 4.7 again, (v) follows.

Finally, we show that  $\dim(\mathrm{T}_{X_0}\mathrm{H}_\Gamma)_{(\alpha)} \leq 1$ . Since  $\alpha \in \mathbb{Z}\Gamma$ , there is at least one  $\lambda \in E(\alpha)$ . Lemma 4.8 and Theorem 4.5 again imply that  $[v] = [y_\lambda]$  for some  $y_\lambda \in V(\lambda)$ , which finishes the proof. ■

**Remark 4.10.** By Corollary 4.2 and the proof of Proposition 4.9, the preceding lemma gives alternative conditions for  $\alpha$  to be  $N$ -adapted to  $\Gamma$  when  $\Gamma$  is free. We list them as a separate lemma, since they seem easier to check than those in Corollary 2.17. □

**Proof of Proposition 4.6.** Lemma 4.9 says that  $\dim(\mathrm{T}_{X_0}\mathrm{H}_\Gamma)_{(\alpha)} \leq 1$ . We assume conditions (i)–(v) in Lemma 4.9 and deduce conditions (1), (2), (a), (b), and (c) in Corollary 2.17. For (1) and (c), there is nothing to show. For the spherical root  $\alpha$ , (2) follows from (1). To show (a), we first claim that  $E(\alpha)$  contains at least one element. Indeed,  $\alpha \in \mathbb{Z}\Gamma$  and  $\langle \lambda^\#, \alpha \rangle > 0$  for at least one  $\lambda \in F$ , for otherwise  $-\alpha$  would be a dominant weight. The claim now follows from (iii). Next, suppose  $\lambda^\# \in E(\alpha)$ . Clearly  $\lambda^\# \in a(\alpha)$ . We claim that  $\alpha^\vee - \lambda^\# \neq \lambda^\#$ . Otherwise, we would have  $\lambda^\# = \frac{1}{2}\alpha^\vee$ , which would contradict (ii). This shows  $|a(\alpha)| \geq 2$ . Now, if  $a(\alpha)$  had a third element, then  $E(\alpha)$  would have two elements, say  $\lambda^\#$  and  $\mu^\#$ , with  $\alpha^\vee - \lambda^\# \neq \mu^\#$ . But this yields a contradiction: by (v), we have that  $\langle \alpha^\vee, \lambda \rangle = \langle \alpha^\vee, \mu \rangle = 1$  and then that  $\alpha^\vee - \lambda^\#$  takes the same values as  $\mu^\#$  on  $F$ . We have deduced (a). Finally, (b) is clear since  $a(\alpha) = \{\lambda^\#, \alpha^\vee - \lambda^\#\}$  for some  $\lambda \in F(\alpha)$ . ■

### 4.3 The non-simple spherical roots

To complete the proof of Theorem 4.1, we show in this section that if  $\gamma$  is a spherically closed spherical root, which is not a simple root and which occurs as a  $T_{\text{ad}}$ -weight in  $T_{X_0}H_\Gamma$ , then  $\gamma$  is  $N$ -adapted to  $\Gamma$ .

We recall that conditions (1) and (2) of Corollary 2.17 follow from Theorem 3.15. We now verify condition (3): if  $\delta \in E(\Gamma)$  such that  $\langle \delta, \gamma \rangle > 0$ , then there exists  $\beta \in S \setminus S^p(\Gamma)$  such that  $\beta^\vee$  is a positive multiple of  $\delta$ . The argument is the same for all the non-simple spherical roots  $\gamma$ .

Let  $v \in V$  be a  $T_{\text{ad}}$ -eigenvector of weight  $\gamma$  such that  $0 \neq [v] \in (V/\mathfrak{g} \cdot x_0)^{G_{x_0}}$ . Let  $\lambda \in F$ . Recall that  $z_\lambda = x_0 - v_\lambda$  and put  $a = \langle \lambda^\#, \gamma \rangle$ . Assume  $a > 0$ .

We claim that under this assumption,  $\text{codim}_{x_0} G \cdot z_\lambda \geq 2$ . Indeed, if  $\text{codim}_{x_0} G \cdot z_\lambda$  were 1, then by Theorem 4.5(B)  $a = 1$  and by Theorem 4.5(C) there would exist  $\hat{v} \in V(\lambda)$  such that  $[v] = [\hat{v}]$  as elements of  $V/\mathfrak{g} \cdot x_0$ . Therefore, there would exist  $\alpha \in S$  such that  $\gamma - \alpha \in R^+$ , and such that  $X_\alpha \hat{v}$  is nonzero and is equal to  $X_{-\gamma+\alpha} x_0$  up to a nonzero scalar multiple. This would imply  $X_{-\gamma+\alpha} v_\lambda \neq 0$  and  $X_{-\gamma+\alpha} v_\mu = 0$  for all  $\mu \in F \setminus \{\lambda\}$ , and therefore that there exists  $\alpha' \in S$  such that  $\langle (\alpha')^\vee, \lambda \rangle > 0$  and  $\langle (\alpha')^\vee, \mu \rangle = 0$  for all  $\mu \in F \setminus \{\lambda\}$ , which gives a contradiction with Proposition 4.4 and proves the claim.

The fact that  $\text{codim}_{x_0} G \cdot z_\lambda \geq 2$  means that there exists  $\beta \in S$  such that  $\langle \beta^\vee, \lambda \rangle > 0$  and  $\langle \beta^\vee, \mu \rangle = 0$  for all  $\mu \in F \setminus \{\lambda\}$ . This says exactly that the restriction of  $\beta^\vee$  to  $\mathbb{Z}\Gamma$  is a positive multiple of  $\lambda^\#$ , which is condition (3).

We continue with the remaining conditions of Corollary 2.17. Condition (4) does not apply to non-simple spherical roots.

Condition (5) follows using the analysis of Section 3. Indeed, we have shown that if  $[v]$  is a nonzero  $T_{\text{ad}}$ -eigenvector of weight  $2\alpha$  in  $(V/\mathfrak{g} \cdot x_0)^{G_{x_0}}$ , with  $\alpha \in S$ , then  $X_\alpha v$  is a (nonzero) scalar multiple of  $X_{-\alpha} x_0$ . Since  $2\alpha \in \mathbb{Z}\Gamma$ , there exists  $\lambda \in F$  such that  $\langle \alpha^\vee, \lambda \rangle > 0$  and  $\langle \lambda^\#, 2\alpha \rangle > 0$ . By the argument we used for condition (3),  $\lambda$  is the unique element of  $F$  which is non-orthogonal to  $\alpha$ . It follows that we actually have that  $X_\alpha v$  is a nonzero scalar multiple of  $X_{-\alpha} v_\lambda$ . This implies that the  $T$ -eigenspace of weight  $\lambda - 2\alpha$  in  $V(\lambda)$  is nonzero, hence  $\langle \alpha^\vee, \lambda \rangle \geq 2$ . Consequently  $\langle \alpha^\vee, \lambda \rangle \in \{2, 4\}$  and  $\langle \alpha^\vee, \mu \rangle = 0$  for all  $\mu \in F \setminus \{\lambda\}$ , hence  $\alpha^\vee$  takes an even value on every element of  $\mathbb{Z}\Gamma$ .

Condition (6) follows analogously from Section 3. Indeed, we have shown that if  $[v]$  is a nonzero  $T_{\text{ad}}$ -eigenvector of weight  $\alpha + \alpha'$  in  $(V/\mathfrak{g} \cdot x_0)^{G_{x_0}}$ , with  $\alpha$  and  $\alpha'$  orthogonal simple roots, then  $X_\alpha v$ , if nonzero, is a scalar multiple of  $X_{-\alpha'} x_0$ , and  $X_{\alpha'} v$ , if nonzero, is a scalar multiple of  $X_\alpha x_0$ .

Since  $\alpha + \alpha' \in \mathbb{Z}\Gamma$ , there exists  $\lambda \in F$  such that  $\langle \alpha^\vee, \lambda \rangle > 0$  and  $\langle \lambda^\#, \alpha + \alpha' \rangle > 0$ . By the argument we used for condition (3),  $\lambda$  is the unique element of  $F$  which is

non-orthogonal to  $\alpha$ . Then  $X_\alpha v \neq 0$ . Indeed if it were 0, then  $X_{\alpha'} v$  would be nonzero, hence scalar multiple of  $X_{-\alpha} v_\lambda$ , which yields a contradiction:

$$0 = X_{\alpha'} X_\alpha v = X_\alpha X_{\alpha'} v = X_\alpha X_{-\alpha} v_\lambda \neq 0,$$

Therefore  $X_\alpha v = X_{-\alpha'} x_0$ , and if  $\langle (\alpha')^\vee, \mu \rangle \neq 0$  then the  $T$ -eigenspace of weight  $\mu - \alpha - \alpha'$  in  $V(\mu)$  is nonzero, hence also  $\langle \alpha^\vee, \mu \rangle \neq 0$ . This implies that  $\alpha'$  is non-orthogonal to  $\lambda$  and orthogonal to  $\mu$  for all  $\mu \in F \setminus \{\lambda\}$ . Therefore  $\alpha^\vee$  and  $(\alpha')^\vee$  are equal on every element of  $\mathbb{Z}\Gamma$ . This completes the proof of Theorem 4.1.

**Remark 4.11.** The information given in this remark is not needed for our results. We include it because it gives explicit conditions on  $F$  for each spherically closed spherical root  $\gamma$ , which is not a simple root, to occur as a  $T_{\text{ad}}$ -weight in  $T_{X_0} H_\Gamma$ , that is, to be  $N$ -adapted to  $\Gamma$ .

For each spherically closed spherical root  $\gamma$ , there exists  $\alpha \in S$  such that  $\langle \alpha^\vee, \gamma \rangle > 0$ . If  $\gamma$  is a  $T_{\text{ad}}$ -weight in  $T_{X_0} H_\Gamma$ , then  $\gamma \in \mathbb{Z}\Gamma$ , and so there exists  $\lambda \in F$  such that  $\langle \alpha^\vee, \lambda \rangle > 0$  and  $\langle \lambda^\#, \gamma \rangle > 0$ . If  $\gamma$  is not a simple root, then by the argument above showing that  $\gamma$  satisfies condition (3) of Corollary 2.17, we have that  $\lambda$  is the only element of  $F$  which is not orthogonal to  $\alpha$ , that is,  $b\lambda^\# = \alpha^\vee$  on  $\mathbb{Z}\Gamma$  for some positive integer  $b$ .

We now list, for each  $\gamma$ , the possibilities for  $\lambda^\#$ .

- (1) If  $\gamma = 2\alpha$ , with  $\alpha$  a simple root, then locally  $\gamma = 4\omega$ . In this case  $\alpha^\vee = b\lambda^\#$  with  $b \in \{2, 4\}$ .
- (2) If  $\gamma = \alpha + \alpha'$ , with  $\alpha$  and  $\alpha'$  two orthogonal simple roots, then locally  $\gamma = 2\omega + 2\omega'$ . In this case  $\alpha^\vee = (\alpha')^\vee = b\lambda^\#$  with  $b \in \{1, 2\}$ .
- (3) If  $\gamma = \alpha_1 + \alpha_2 + \cdots + \alpha_n$  with support of type  $A_n$  with  $n \geq 2$ , then locally  $\gamma = \omega_1 + \omega_n$ . In this case,  $\alpha^\vee = \lambda^\#$  with  $\alpha \in \{\alpha_1, \alpha_n\}$ .
- (4) If  $\gamma = \alpha_1 + 2\alpha_2 + \alpha_3$  with support of type  $A_3$ , then locally  $\gamma = 2\omega_2$ . In this case, we have  $\alpha_2^\vee = b\lambda^\#$  with  $b \in \{1, 2\}$ .
- (5) If  $\gamma = \alpha_1 + \cdots + \alpha_n$  with support of type  $B_n$  with  $n \geq 2$ , then locally  $\gamma = \omega_1$ . Here  $\alpha_1^\vee = \lambda^\#$ .
- (6) If  $\gamma = 2\alpha_1 + 2\alpha_2 + \cdots + 2\alpha_n$  with support of type  $B_n$  with  $n \geq 2$ , then locally  $\gamma = 2\omega_1$ . Here  $\alpha_1^\vee = b\lambda^\#$ , with  $b \in \{1, 2\}$ .
- (7) If  $\gamma = \alpha_1 + 2\alpha_2 + 3\alpha_3$  with support of type  $B_3$ , then locally  $\gamma = 2\omega_3$ . Here  $\alpha_3^\vee = b\lambda^\#$  with  $b \in \{1, 2\}$ .
- (8) If  $\gamma = \alpha_1 + 2\alpha_2 + 2\alpha_3 + \cdots + 2\alpha_{n-1} + \alpha_n$  with support of type  $C_n$  with  $n \geq 3$ , then locally  $\gamma = \omega_2$ . Here  $\alpha_2^\vee = \lambda^\#$ .

- (9) If  $\gamma = 2\alpha_1 + 2\alpha_2 + \cdots + 2\alpha_{n-2} + \alpha_{n-1} + \alpha_n$  with support of type  $D_n$  with  $n \geq 4$ , then locally  $\gamma = 2\omega_1$ . Here  $\alpha_1^\vee = b\lambda^\#$  with  $b \in \{1, 2\}$ .
- (10) If  $\gamma = \alpha_1 + 2\alpha_2 + 3\alpha_3 + 2\alpha_4$  with support of type  $F_4$ , then locally  $\gamma = \omega_4$ . Here  $\alpha_4^\vee = \lambda^\#$ .
- (11) If  $\gamma = 4\alpha_1 + 2\alpha_2$  with support of type  $G_2$ , then locally  $\gamma = 2\omega_1$ . Here  $\alpha_1^\vee = b\lambda^\#$  with  $b \in \{1, 2\}$ .
- (12) If  $\gamma = \alpha_1 + \alpha_2$  with support of type  $G_2$ , then locally  $\gamma = -\omega_1 + \omega_2$ . Here  $\alpha_2^\vee = \lambda^\#$ . □

## 5 The Irreducible Components of $M_\Gamma$

In this section, we prove the following theorem.

**Theorem 5.1.** Let  $\Gamma$  be a free monoid of dominant weights. Then the  $T_{\text{ad}}$ -orbit closures in  $M_\Gamma$ , equipped with their reduced induced scheme structure, are affine spaces. □

The proof is given below. By [2, Proposition 2.13] this theorem has the following formal consequence.

**Corollary 5.2.** If  $X$  is an affine spherical variety with free weight monoid, then its root monoid  $\mathcal{M}_X$  is free too. □

Another consequence is that Conjecture 1.1 holds for free monoids.

**Corollary 5.3.** If  $\Gamma$  is a free monoid of dominant weights, then the irreducible components of  $M_\Gamma$ , equipped with their reduced induced scheme structure, are affine spaces. □

**Proof.** Since the  $T_{\text{ad}}$ -orbits in  $M_\Gamma$  are in bijection with isomorphism classes of affine spherical  $G$ -varieties, by [2, Theorem 1.12] and there are only finitely many such isomorphism classes, by [2, Corollary 3.4], we have that every irreducible component  $Z$  of  $M_\Gamma$  contains a dense  $T_{\text{ad}}$ -orbit. It then follows from Theorem 5.1 that  $Z$ , equipped with its reduced induced scheme structure, is an affine space. ■

**Proof of Theorem 5.1.** Let  $X$  be an affine spherical  $G$ -variety of weight monoid  $\Gamma$ , seen as a (closed) point in  $M_\Gamma$ . By [2, Corollary 2.14], we know that the normalization of  $\overline{T_{\text{ad}} \cdot X}$  is an affine space. It is therefore enough to show that  $\overline{T_{\text{ad}} \cdot X}$  is smooth at  $X_0$ . We do this



by showing that

$$\dim T_{X_0}(\overline{T_{\text{ad}} \cdot \bar{X}}) = \dim \overline{T_{\text{ad}} \cdot \bar{X}}. \quad (5.1)$$

Recall that  $\Sigma^N(X)$  is the basis of the monoid obtained by saturation of the root monoid  $\mathcal{M}_X$ . To deduce (5.1) we make use of Theorem 4.1: the  $T_{\text{ad}}$ -weights in  $T_{X_0}(\overline{T_{\text{ad}} \cdot \bar{X}}) \subseteq T_{X_0}M_\Gamma$  are spherical roots  $N$ -adapted to  $\Gamma$ , each one occurring with multiplicity 1. This, together with the fact that every  $T_{\text{ad}}$ -weight in  $T_{X_0}(\overline{T_{\text{ad}} \cdot \bar{X}})$  has to be an element of the root monoid  $\mathcal{M}_X$ , and hence a nonnegative integer linear combination of elements of  $\Sigma^N(X)$ , gives (5.1) once we prove Proposition 5.4. Indeed, applying this proposition with  $\Sigma = \Sigma^N(X)$  yields that the  $T_{\text{ad}}$ -weights in  $T_{X_0}(\overline{T_{\text{ad}} \cdot \bar{X}})$  belong to  $\Sigma^N(X)$ , while  $\dim \overline{T_{\text{ad}} \cdot \bar{X}} = |\Sigma^N(X)|$  by [2, Proposition 2.13]. ■

**Proposition 5.4.** Let  $\Sigma$  be a subset of  $\Sigma^{sc}(G)$  such that every  $\gamma \in \Sigma$  is  $N$ -adapted to  $\Gamma$ . If  $\sigma \in \Sigma^{sc}(G) \cap \mathbb{N}\Sigma$  is  $N$ -adapted to  $\Gamma$ , then  $\sigma \in \Sigma$ . □

**Proof.** First of all,  $\sigma$  (of spherically closed type) must be compatible with  $S^p(\Gamma)$  and is a nonnegative integer linear combination of other elements of  $\Sigma^{sc}(G)$  that satisfy the same compatibility condition. This gives strong restrictions. Indeed,  $\sigma$  can only be the sum of two simple roots (equal or not, orthogonal or not). All the other types of spherical roots have support that nontrivially intersects  $S^p(\Gamma)$ , and they can be excluded by a straightforward if somewhat lengthy case-by-case verification.

Moreover,  $\sigma$  cannot be the double of a simple root, say  $2\alpha$ , with  $\alpha \in \Sigma$ , since  $\alpha$  and  $2\alpha$  cannot both be  $N$ -adapted to  $\Gamma$ . Indeed, if  $2\alpha$  is  $N$ -adapted to  $\Gamma$  then, since  $\langle \alpha^\vee, 2\alpha \rangle > 0$  and  $\alpha^\vee \in \Gamma^\vee$ , there exists  $\delta \in E(\Gamma)$  such that  $\langle \delta, 2\alpha \rangle > 0$ . Condition (3) of Corollary 2.17 tells us that  $\alpha^\vee$  is a positive multiple of  $\delta$ . By condition (5) of the same corollary,  $\alpha^\vee$  is not primitive in  $(\mathbb{Z}\Gamma)^*$ . If now  $\alpha \in \mathbb{Z}\Gamma$ , then it follows from  $\langle \alpha^\vee, \alpha \rangle = 2$  that  $\alpha^\vee = 2\delta$  on  $\mathbb{Z}\Gamma$ . Hence  $\delta$  is the only element of  $a(\alpha)$  and  $\alpha$  is not  $N$ -adapted to  $\Gamma$ .

Analogously,  $\sigma$  cannot be the sum of two orthogonal simple roots, say  $\alpha + \alpha'$ , with  $\alpha$  and  $\alpha'$  in  $\Sigma$ . Indeed, since  $\alpha + \alpha'$  is adapted to  $\Gamma$  and  $\langle \alpha^\vee, \alpha \rangle \neq \langle (\alpha')^\vee, \alpha \rangle$ ,  $\alpha$  cannot belong to  $\mathbb{Z}\Gamma$ .

Finally, let  $\sigma$  be the sum of two nonorthogonal simple roots, say  $\alpha_1 + \alpha_2$ , with  $\alpha_1$  and  $\alpha_2$  in  $\Sigma$ . Take  $\delta \in E(\Gamma)$  with  $\langle \delta, \sigma \rangle > 0$ . Such a  $\delta$  exists because  $\langle \alpha_1^\vee, \sigma \rangle$  or  $\langle \alpha_2^\vee, \sigma \rangle$  is positive,  $\sigma \in \mathbb{Z}\Gamma$  and  $\Gamma \subset \Lambda^+$ . Then  $\delta$  must be positive on at least one of the two simple roots  $\alpha_1$  or  $\alpha_2$ . Suppose it is positive on  $\alpha_1$ . Then  $\delta \in a(\alpha_1)$ , since  $\alpha_1$  is  $N$ -adapted to  $\Gamma$ , hence  $\delta$  takes the value 1 on  $\alpha_1$ . By condition (3) of Corollary 2.17 it follows that  $\alpha_1^\vee = 2\delta$ , which is not possible if  $\alpha_1$  is  $N$ -adapted to  $\Gamma$ . ■

**Remark 5.5.** While the reduced induced scheme structure is the only natural scheme structure on the  $T_{\text{ad}}$ -orbit closures of Theorem 5.1, there is at least one other natural scheme structure on the irreducible components of  $M_\Gamma$ , namely the one given by the primary ideals of  $\mathbb{k}[M_\Gamma]$  associated with minimal primes. One can ask whether Conjecture 1.1 remains true for that scheme structure. Another natural question is whether or when  $M_\Gamma$  is in fact a reduced scheme. We note that the tangent space  $T_{X_0}M_\Gamma$  might fail to detect the “non-reducedness” of  $M_\Gamma$ . For example, the two affine schemes  $\text{Spec}(\mathbb{k}[x, y]/\langle xy \rangle)$  and  $\text{Spec}(\mathbb{k}[x, y]/\langle x^2y \rangle)$  have the same tangent space at the point corresponding to the maximal ideal  $\langle x, y \rangle$ .  $\square$

### Funding

The second author received support from The City University of New York PSC-CUNY Research Award Program and from the National Science Foundation through grant DMS 1407394.

### Acknowledgements

The authors are grateful to the Institut Fourier for hosting them in the summer of 2011, when work on this project began. They also thank the Centro Internazionale per la Ricerca Matematica in Trento, as well as Friedrich Knop and the Emmy Noether Zentrum in Erlangen for their hospitality in the summers of 2012 and 2013, respectively.

The authors are grateful to Michel Brion for suggesting this problem and for helpful discussion. They also thank Domingo Luna for discussion and suggestions in the summer of 2011 and for sharing his working paper of 2005; they were particularly helpful for Section 2. They thank Jarod Alper for a clarifying exchange, summarized in Remark 5.5, about scheme structures on irreducible components of affine schemes. It alerted them to a mistake in an earlier version of this paper.

The authors thank the referee for several helpful suggestions, and in particular for providing an elementary proof of Proposition 2.10(b) and for correcting an error in an earlier version of the proof of (d) and (e) of the same proposition.

As this paper was being completed, R. Avdeev and S. Cupit-Foutou announced that they had independently obtained similar results [3].

### Note added during review

While this paper was under review, a second version of the preprint [3] was posted on the arXiv, in which Avdeev and Cupit-Foutou propose a proof of Conjecture 1.1 for all normal monoids  $\Gamma$  and an example of a non-reduced moduli scheme  $M_\Gamma$  (cf. Remark 5.5).

## References

- [1] Ahiezer, D. "Equivariant completions of homogeneous algebraic varieties by homogeneous divisors." *Annals of Global Analysis and Geometry* 1, no. 1 (1983): 49–78.
- [2] Alexeev, V. and M. Brion. "Moduli of affine schemes with reductive group action." *Journal of Algebraic Geometry* 14, no. 1 (2005): 83–117.
- [3] Avdeev, R. and S. Cupit-Foutou. "On the irreducible components of some moduli schemes for affine multiplicity-free varieties." (2014): preprint arXiv:1406.1713v1.
- [4] Bravi, P. and S. Cupit-Foutou. "Equivariant deformations of the affine multicone over a flag variety." *Advances in Mathematics* 217, no. 6 (2008): 2800–21.
- [5] Bravi, P. and D. Luna. "An introduction to wonderful varieties with many examples of type  $F_4$ ." *Journal of Algebra* 329, no. 1 (2011): 4–51.
- [6] Bravi, P. and G. Pezzini. "Primitive wonderful varieties." *Mathematische Zeitschrift*, to appear.
- [7] Bourbaki, N. *Éléments de mathématique. Fasc. XXXIV. Groupes et algèbres de Lie. Chapitre IV: Groupes de Coxeter et systèmes de Tits. Chapitre V: Groupes engendrés par des réflexions. Chapitre VI: systèmes de racines.* Actualités Scientifiques et Industrielles 1337. Paris: Hermann, 1968.
- [8] Brion, M. "On Spherical Varieties of Rank one (After D. Ahiezer, A. Huckleberry, D. Snow)." *Group actions and invariant theory, (Montreal, PQ, 1988), CMS Conf. Proc.*, 31–41. Providence, RI: American Mathematical Society, 1989.
- [9] Brion, M. "Vers une généralisation des espaces symétriques." *Journal of Algebra* 134, no. 1 (1990): 115–43.
- [10] Brion, M. "Introduction to actions of algebraic groups." *Les cours du CIRM* 1, no. 1 (2010): 1–22.
- [11] Brion, M. "Invariant Hilbert Schemes." *Handbook of Moduli, vol. I*, 64–117. Advanced Lectures in Mathematics (ALM) 24. Somerville, MA: International Press, 2013.
- [12] Camus, R. "Variétés sphériques affines lisses." Ph.D. thesis, Institut Fourier, Grenoble, 2001.
- [13] Cupit-Foutou, S. "Wonderful varieties: a geometrical realization." (2010): preprint arXiv:0907.2852v3.
- [14] Humphreys, J. E. *Introduction to Lie Algebras and Representation Theory*. Graduate Texts in Mathematics 9. New York, Berlin: Springer, 1972.
- [15] Humphreys, J. E. *Linear Algebraic Groups*. Graduate Texts in Mathematics 21. New York: Springer, 1975.
- [16] Jansou, S. "Déformations des cônes de vecteurs primitifs." *Mathematische Annalen* 338, no. 3 (2007): 627–67.
- [17] Knop, F. "The Luna-Vust Theory of Spherical Embeddings." *Proceedings of the Hyderabad Conference on Algebraic Groups (Hyderabad, 1989)*, 225–49. Madras: Manoj Prakashan, 1991.
- [18] Knop, F. "Automorphisms, root systems, and compactifications of homogeneous varieties." *Journal of the American Mathematical Society* 9, no. 1 (1996): 153–74.

- [19] Losev, I. V. "Proof of the Knop conjecture." *Annales de l'institut Fourier (Grenoble)* 59, no. 3 (2009): 1105–34.
- [20] Losev, I. V. "Uniqueness property for spherical homogeneous spaces." *Duke Mathematical Journal* 147, no. 2 (2009): 315–43.
- [21] Luna, D. "Variétés sphériques de type A." *Institut des Hautes Études Scientifiques. Publications Mathématiques* 94 (2001): 161–226.
- [22] Miller, E. and B. Sturmfels. *Combinatorial Commutative Algebra*. Graduate Texts in Mathematics 227. New York: Springer, 2005.
- [23] Papadakis, S. A. and B. Van Steirteghem. "Equivariant degenerations of spherical modules for groups of type A." *Annales de l'institut Fourier (Grenoble)* 62, no. 5 (2012): 1765–809.
- [24] Papadakis, S. A. and B. Van Steirteghem. "Equivariant degenerations of spherical modules: part II." (2015): preprint arXiv:1505.07446v1.
- [25] Pezzini, G. "Lectures on spherical and wonderful varieties." *Les cours du CIRM* 1, no. 1 (2010): 33–53.
- [26] Pezzini, G. "On Reductive Automorphism Groups of Regular Embeddings." *Transformation Groups* 20, no. 1 (2015): 247–89.
- [27] Timashev, D. A. *Homogeneous Spaces and Equivariant Embeddings*. Encyclopaedia of Mathematical Sciences 138. Heidelberg: Springer, 2011. Invariant Theory and Algebraic Transformation Groups, 8. (2012e:14100).
- [28] Van Steirteghem, B. "Various interpretations of the root system(s) of a spherical variety." *Oberwolfach Reports* 10, no. 2 (2013): 1464–7.
- [29] Vinberg, É. B. and V. L. Popov. "A certain class of quasihomogeneous affine varieties." *Izvestiya Akademii Nauk SSSR. Seriya Matematicheskaya* 36 (1972): 749–64. English translation in *Mathematics of the USSR-Izvestiya* 6 (1972) 743–58.
- [30] Wasserman, B. "Wonderful varieties of rank two." *Transformation Groups* 1, no. 4 (1996): 375–403.
